# Supplementary material
Source: PubMed Central journal article supplement (PMC9893514)
Supplement: NIHMS1866697-supplement-S1.pdf [file NIHMS1866697-supplement-S1.pdf]

SHAM RSNA Time Course (Fig. 1C)

| Control  |        |        |        |        |        |        |        |        |        |         |         |         | PcTx-1   |        |        |        |        |        |        |        |        |        |         |         |         |    |
|----------|--------|--------|--------|--------|--------|--------|--------|--------|--------|---------|---------|---------|----------|--------|--------|--------|--------|--------|--------|--------|--------|--------|---------|---------|---------|----|
| TIME (s) | Rat #1 | Rat #2 | Rat #3 | Rat #4 | Rat #5 | Rat #6 | Rat #7 | Rat #8 | Rat #9 | Rat #10 | Rat #11 | Rat #12 | TIME (s) | Rat #1 | Rat #2 | Rat #3 | Rat #4 | Rat #5 | Rat #6 | Rat #7 | Rat #8 | Rat #9 | Rat #10 | Rat #11 | Rat #12 |    |
| 0        | 0      | 0      | 0      | 0      | 0      | 0      | 0      | 0      | 0      | 0       | 0       | 0       | 0        | 0      | 0      | 0      | 0      | 0      | 0      | 0      | 0      | 0      | 0       | 0       | 0       |    |
| 1        | 19     | -1     | -10    | 9      | -11    | 13     | 11     | -7     | 8      | -5      | 0       | 4       | 1        | 42     | 7      | -11    | 0      | 2      | 4      | 6      | -9     | 3      | -3      | -11     | -24     |    |
| 2        | 144    | 4      | -13    | -16    | -5     | 64     | 12     | -17    | 5      | -2      | 20      | 18      | 2        | 24     | -4     | 2      | 8      | -20    | 67     | -1     | -47    | 2      | -6      | 4       | -10     |    |
| 3        | 207    | -4     | 11     | 4      | 6      | 92     | 5      | -29    | 1      | 2       | 11      | 54      | 3        | 172    | -4     | -10    | 5      | 18     | 72     | -2     | -46    | 5      | -10     | 5       | 18      |    |
| 4        | 190    | -5     | 47     | 85     | 114    | 64     | 11     | -21    | 8      | 50      | 9       | -24     | 4        | 241    | -12    | -56    | 4      | 83     | 73     | -9     | -32    | 6      | -23     | -12     | 8       |    |
| 5        | 200    | 2      | -9     | 115    | 169    | -12    | 8      | -29    | 10     | 74      | 25      | 2       | 5        | 270    | -5     | -51    | 66     | 90     | 42     | 6      | -44    | 15     | -21     | -1      | -35     |    |
| 6        | 173    | 2      | 2      | 121    | 133    | 8      | 11     | -32    | 19     | 58      | 27      | 9       | 6        | 151    | -2     | -32    | 83     | -81    | -68    | -2     | -31    | 6      | -21     | 9       | -2      |    |
| 7        | 68     | 7      | -38    | 142    | 67     | -35    | 5      | 0      | 5      | -29     | 22      | 2       | 7        | 91     | -4     | -15    | 109    | 6      | -45    | -3     | -20    | 13     | -22     | 0       | 78      |    |
| 8        | 76     | -6     | -16    | -75    | 38     | 5      | 2      | -18    | 5      | 16      | 17      | 4       | 8        | 9      | 2      | -18    | -5     | 5      | -13    | -1     | -3     | -2     | -9      | -14     | -29     |    |
| 9        | 8      | 6      | -18    | -53    | 19     | -6     | 9      | 10     | 7      | 8       | 22      | 1       | 9        | 37     | -9     | -7     | 10     | -1     | -40    | -15    | 6      | 4      | 1       | -2      | -18     |    |
| 10       | -45    | -4     | -4     | -25    | 12     | -13    | 16     | -8     | 4      | 5       | 19      | 7       | 10       | 27     | 5      | -8     | 21     | 7      | -12    | 4      | 6      | 14     | -1      | -11     | 6       |    |
| 11       | -43    | -1     | -7     | -19    | -43    | -10    | 14     | 8      | 1      | -19     | 23      | 6       | 11       | -40    | -6     | -6     | 3      | -18    | -28    | -10    | 9      | 12     | 1       | -24     | -1      |    |
| 12       | -48    | 0      | -13    | -18    | -26    | -8     | 20     | 5      | 2      | -12     | 8       | 0       | 12       | -45    | 4      | -17    | -2     | 0      | 2      | 0      | 17     | 3      | -5      | -8      | 35      |    |
| 13       | -36    | -6     | -3     | -34    | -6     | -12    | 11     | 3      | 2      | -3      | 9       | 3       | 13       | -11    | -6     | 0      | -12    | -20    | -19    | 4      | -3     | 2      | 3       | -5      | 26      |    |
| 14       | -30    | -6     | -3     | -25    | -27    | -20    | 28     | -3     | 2      | -12     | 4       | 8       | 14       | -34    | 0      | -3     | -14    | -7     | -6     | 0      | 4      | 3      | 2       | 11      | 27      |    |
| 15       | -19    | 4      | 2      | -18    | -18    | -1     | 25     | 2      | -3     | -8      | 10      | 4       | 15       | -25    | -2     | -6     | -22    | 23     | -17    | -2     | 10     | 7      | 3       | -9      | 5       |    |
| 16       | -37    | -1     | -11    | -29    | -19    | -3     | 14     | 13     | -1     | -8      | 15      | 10      | 16       | -29    | 4      | -8     | -20    | 18     | -7     | -11    | -1     | 3      | -2      | -3      | 9       |    |
| 17       | -17    | -3     | 3      | -27    | -13    | -2     | 17     | -6     | 9      | -6      | 12      | 6       | 17       | -28    | -3     | -6     | 3      | -25    | -23    | -14    | -10    | 14     | 11      | 8       | -3      | -5 |
| 18       | -29    | 3      | -6     | -27    | 21     | -6     | 16     | 4      | -9     | 9       | 8       | 5       | 18       | 3      | -5     | 6      | -14    | -13    | -6     | 12     | 9      | 1      | -2      | 6       | 17      |    |
| 19       | 18     | 4      | -2     | -23    | -38    | -2     | 22     | -1     | 2      | -17     | 7       | 4       | 19       | -48    | 0      | -1     | 6      | -17    | -17    | -20    | -6     | -8     | 0       | -3      | -21     | 33 |
| 20       | -14    | 4      | -1     | -30    | 15     | 0      | 13     | -6     | -3     | 7       | 10      | 5       | 20       | -24    | -10    | -7     | -28    | -6     | -10    | -11    | -6     | -1     | 2       | -1      | -1      | 26 |
| 21       | 7      | -1     | -6     | -18    | -12    | -4     | 13     | -1     | 9      | -5      | 7       | 4       | 21       | 11     | -4     | -1     | 3      | -25    | -14    | -6     | -22    | 0      | -1      | -7      | 9       | 25 |
| 22       | 0      | 3      | 2      | -32    | -6     | -1     | 25     | 11     | 0      | -3      | 11      | 5       | 22       | -51    | -9     | -7     | -29    | -30    | -7     | -17    | 3      | 3      | -3      | -11     | 21      |    |
| 23       | 18     | -4     | -7     | -29    | 1      | 3      | 10     | 1      | -6     | 1       | 11      | 9       | 23       | 0      | -1     | 6      | -12    | -19    | -9     | -15    | 2      | 13     | 6       | -19     | 50      |    |
| 24       | -23    | -2     | -10    | -17    | 6      | 0      | 19     | 23     | -3     | 3       | 17      | 7       | 24       | -8     | -5     | -2     | -44    | -16    | -18    | -14    | 22     | 7      | -8      | -1      | 10      |    |
| 25       | 30     | -1     | -1     | -11    | -19    | -2     | 11     | 1      | 3      | -8      | 4       | 6       | 25       | -44    | -2     | -5     | -16    | -22    | -3     | -18    | -9     | -3     | -2      | 5       | 46      |    |
| 26       | 17     | -3     | -4     | -43    | -9     | -14    | 16     | -1     | 0      | -4      | 3       | 3       | 26       | 6      | -2     | -8     | -48    | -4     | -7     | -12    | 8      | -8     | 2       | -10     | 55      |    |
| 27       | 27     | 1      | -15    | -16    | -1     | -1     | 15     | -6     | 7      | 0       | 8       | 11      | 27       | 12     | 2      | -6     | -9     | -21    | -20    | -31    | -2     | 3      | 1       | -3      | 38      |    |
| 28       | 21     | 3      | 0      | -30    | -2     | -3     | 14     | 3      | -1     | -1      | 1       | 7       | 28       | 3      | -2     | -8     | -9     | -1     | -14    | -12    | 2      | 7      | -12     | 11      | 54      |    |
| 29       | 32     | 4      | -7     | -16    | -3     | -6     | 12     | -6     | 5      | -1      | 2       | 11      | 29       | 0      | -2     | -7     | -56    | -16    | -2     | -16    | 13     | 5      | -4      | -12     | 20      |    |
| 30       | 59     | 4      | -7     | -16    | -3     | -6     | 12     | -6     | 5      | -1      | 2       | 11      | 30       | 0      | -2     | -7     | -56    | -16    | -2     | -16    | 13     | 5      | -4      | -12     | 20      |    |

|          |        | HF-rEF RSNA Time Course (Fig. 1D) |        |        |        |        |        |        |        |         |         |          |        |        |        |        |        |        |        |        |        |         |         |
|----------|--------|-----------------------------------|--------|--------|--------|--------|--------|--------|--------|---------|---------|----------|--------|--------|--------|--------|--------|--------|--------|--------|--------|---------|---------|
|          |        | Control                           |        |        |        |        |        |        |        |         |         | PcTx-1   |        |        |        |        |        |        |        |        |        |         |         |
| TIME (s) | Rat #1 | Rat #2                            | Rat #3 | Rat #4 | Rat #5 | Rat #6 | Rat #7 | Rat #8 | Rat #9 | Rat #10 | Rat #11 | TIME (s) | Rat #1 | Rat #2 | Rat #3 | Rat #4 | Rat #5 | Rat #6 | Rat #7 | Rat #8 | Rat #9 | Rat #10 | Rat #11 |
| 0        | 0      | 0                                 | 0      | 0      | 0      | 0      | 0      | 0      | 0      | 0       | 0       | 0        | 0      | 0      | 0      | 0      | 0      | 0      | 0      | 0      | 0      | 0       | 0       |
| 1        | 15     | -16                               | -2     | 6      | 13     | 16     | 2      | -16    | 6      | -1      | 1       | 1        | 12     | 4      | 2      | 3      | -6     | -4     | 0      | -2     | -14    | -22     | -14     |
| 2        | 27     | 7                                 | -33    | 47     | 18     | 56     | 27     | -8     | -18    | -12     | 115     | 2        | -2     | -19    | -2     | 0      | 29     | 17     | 2      | 1      | -42    | 27      | 33      |
| 3        | 110    | 27                                | -47    | 81     | 36     | 109    | 54     | 41     | 26     | 70      | 190     | 3        | 74     | 2      | -47    | 68     | 21     | 76     | 16     | 3      | -34    | 57      | 108     |
| 4        | 153    | 34                                | -1     | 107    | 97     | 32     | 62     | 75     | 23     | 124     | 160     | 4        | 106    | 22     | -38    | 77     | 46     | 51     | 52     | 4      | -38    | 35      | 80      |
| 5        | 131    | 51                                | 16     | 126    | 58     | -8     | 22     | 58     | 42     | -26     | -104    | 5        | 88     | 16     | -18    | 82     | -4     | 28     | 2      | -14    | -4     | -9      | -94     |
| 6        | 37     | 36                                | 38     | 151    | -4     | -12    | 0      | -40    | 5      | -86     | -111    | 6        | -36    | 8      | -10    | 89     | -36    | -21    | -9     | -18    | 3      | -21     | -73     |
| 7        | -42    | 1                                 | 44     | 110    | -64    | -6     | -28    | -18    | -52    | -65     | -50     | 7        | -49    | -7     | 16     | 117    | -23    | -14    | -4     | -1     | 2      | -12     | -4      |
| 8        | -39    | -6                                | 17     | 107    | 24     | -10    | -5     | -9     | -2     | -38     | -46     | 8        | -4     | -7     | 13     | 105    | 0      | -12    | -9     | -8     | 12     | -13     | 2       |
| 9        | -12    | 0                                 | -13    | 87     | -17    | -10    | -5     | -21    | -6     | -20     | -31     | 9        | 25     | -1     | 3      | 95     | -18    | -23    | -4     | -4     | 3      | -32     | -23     |
| 10       | -27    | -18                               | -2     | 65     | -16    | 28     | 8      | -19    | 1      | -24     | -23     | 10       | -13    | -2     | -3     | 76     | 9      | -12    | -4     | -6     | 3      | -19     | -9      |
| 11       | -18    | -5                                | -14    | 47     | 9      | 34     | -16    | -9     | 2      | -22     | -32     | 11       | 1      | -10    | 7      | 78     | -13    | 27     | -15    | -4     | -2     | -24     | -13     |
| 12       | -39    | -3                                | -18    | 54     | -12    | 0      | -19    | -19    | -19    | -16     | -18     | 12       | -24    | -12    | -5     | 63     | -8     | 9      | -24    | 1      | -1     | -25     | -16     |
| 13       | -18    | -18                               | -16    | 23     | -31    | -8     | -17    | -15    | -27    | 7       | -40     | 13       | -18    | -8     | 1      | 60     | -8     | -12    | -20    | 0      | -11    | -10     | -20     |
| 14       | -20    | -12                               | -12    | 43     | -5     | -6     | -18    | -10    | -18    | -34     | -14     | 14       | -17    | -10    | -15    | 53     | -11    | -13    | -4     | -8     | 6      | -11     | 0       |
| 15       | -28    | -5                                | -25    | 31     | 5      | -18    | -9     | -26    | -30    | 15      | -8      | 15       | -6     | -12    | -8     | 36     | 6      | -14    | -5     | -4     | -4     | -14     | 2       |
| 16       | -9     | -15                               | -8     | 34     | -13    | -11    | -9     | -3     | -22    | 19      | -1      | 16       | -14    | 0      | -14    | 36     | -14    | -21    | -10    | -1     | -5     | -12     | 6       |
| 17       | -6     | -17                               | -14    | 28     | -12    | 55     | -9     | -10    | -19    | 18      | -13     | 17       | -2     | -9     | -15    | 46     | -8     | -8     | -30    | -9     | 3      | -2      | -5      |
| 18       | 1      | -9                                | -13    | 9      | 18     | 53     | -3     | -13    | -22    | -17     | -11     | 18       | 0      | -7     | 3      | 25     | -6     | 37     | -11    | -4     | -19    | 2       | 0       |
| 19       | 29     | -15                               | -7     | 20     | -9     | 23     | -3     | -10    | -24    | 9       | -14     | 19       | -13    | 0      | -6     | 12     | 2      | 32     | -6     | 1      | 0      | -18     | -3      |
| 20       | 8      | -16                               | -3     | 23     | -12    | 1      | 4      | -12    | -13    | 7       | -9      | 20       | -2     | 6      | 7      | 12     | -23    | -7     | -5     | -9     | 5      | -1      | 10      |
| 21       | -6     | -1                                | -14    | 7      | 20     | -8     | -10    | -7     | -21    | 20      | 2       | 21       | -12    | -4     | -7     | 13     | -13    | -5     | -7     | -2     | -4     | -12     | 12      |
| 22       | -8     | -13                               | -11    | 6      | -15    | -1     | 0      | 1      | -19    | -23     | -3      | 22       | 3      | 5      | 6      | 17     | -7     | -14    | -13    | -5     | -13    | -2      | -10     |
| 23       | -1     | -16                               | -6     | -6     | -6     | -11    | 0      | -8     | -11    | 2       | 0       | 23       | 0      | 1      | 8      | 5      | -6     | -20    | 5      | 6      | 38     | -12     | -3      |
| 24       | -7     | -5                                | -5     | 4      | 12     | 4      | -9     | -6     | -11    | 19      | -14     | 24       | -10    | 2      | 8      | 19     | 8      | 6      | -6     | -2     | -3     | -8      | -1      |
| 25       | -1     | -7                                | -5     | -3     | -16    | -11    | -7     | -3     | -9     | 15      | -2      | 25       | 0      | 11     | 5      | -12    | 3      | -8     | -7     | -7     | 41     | -5      | -7      |
| 26       | -13    | -17                               | -8     | -23    | -9     | -1     | -2     | -8     | -19    | -5      | -10     | 26       | -13    | 18     | 7      | 26     | -22    | 8      | -12    | 3      | 33     | -3      | 6       |
| 27       | -12    | 2                                 | -14    | -9     | 27     | -2     | 1      | -4     | -12    | 8       | 28      | 27       | -6     | 7      | 3      | -11    | 0      | 0      | -10    | 7      | 29     | 5       | -11     |
| 28       | 27     | -7                                | -8     | 0      | -11    | -12    | 4      | -3     | -2     | 14      | 6       | 28       | 2      | 13     | 5      | 23     | -10    | -4     | -3     | -7     | 33     | -11     | -9      |
| 29       | 26     | -7                                | -3     | 7      | -22    | 0      | -1     | -9     | -7     | 13      | -45     | 29       | -11    | 15     | -2     | -12    | 2      | 7      | -8     | 11     | 51     | -5      | 2       |
| 30       | -8     | 9                                 | -14    | 7      | -22    | 0      | -1     | -9     | -7     | 13      | -45     | 30       | -2     | 7      | 8      | -12    | 2      | 7      | -8     | 11     | 51     | -5      | 2       |

| SHAM MAP Time Course (Fig. 1E) |        |        |        |        |        |        |        |        |        |         |         |         |          |        |        |        |        |        |        |        |        |        |         |         |         |
|--------------------------------|--------|--------|--------|--------|--------|--------|--------|--------|--------|---------|---------|---------|----------|--------|--------|--------|--------|--------|--------|--------|--------|--------|---------|---------|---------|
| Control                        |        |        |        |        |        |        |        |        |        |         |         |         |          | PcTx-1 |        |        |        |        |        |        |        |        |         |         |         |
| TIME (s)                       | Rat #1 | Rat #2 | Rat #3 | Rat #4 | Rat #5 | Rat #6 | Rat #7 | Rat #8 | Rat #9 | Rat #10 | Rat #11 | Rat #12 | TIME (s) | Rat #1 | Rat #2 | Rat #3 | Rat #4 | Rat #5 | Rat #6 | Rat #7 | Rat #8 | Rat #9 | Rat #10 | Rat #11 | Rat #12 |
| 0                              | 0      | 0      | 0      | 0      | 0      | 0      | 0      | 0      | 0      | 0       | 0       | 0       | 0        | 0      | 0      | 0      | 0      | 0      | 0      | 0      | 0      | 0      | 0       | 0       | 0       |
| 1                              | 3      | 4      | 3      | -3     | -3     | 3      | 1      | 0      | 1      | -3      | -1      | 0       | 1        | 2      | 4      | -1     | -1     | -2     | 2      | -2     | -1     | 3      | 5       | -2      | -1      |
| 2                              | 6      | 4      | 5      | -1     | -2     | 9      | 2      | 2      | 1      | -2      | 0       | -1      | 2        | 5      | 4      | 1      | -1     | -2     | 3      | 5      | 1      | 4      | 6       | -2      | 1       |
| 3                              | 12     | 5      | 5      | 0      | 0      | 16     | 1      | 1      | 2      | 0       | 2       | 6       | 3        | 9      | 6      | 2      | -1     | 0      | 15     | 5      | 0      | 4      | 7       | -2      | -1      |
| 4                              | 20     | 5      | 2      | 3      | 4      | 23     | 2      | 0      | 3      | 4       | 5       | 22      | 4        | 24     | 6      | 3      | 0      | 3      | 26     | 0      | -6     | 5      | 6       | -1      | -4      |
| 5                              | 27     | 3      | 5      | 6      | 7      | 29     | 3      | -7     | 5      | 7       | 5       | 23      | 5        | 37     | 2      | 0      | 0      | 6      | 37     | 1      | -11    | 5      | 3       | -1      | -3      |
| 6                              | 32     | 3      | 10     | 12     | 15     | 33     | 3      | -9     | 6      | 15      | 3       | 16      | 6        | 47     | 1      | -4     | 2      | 7      | 48     | 5      | -13    | 4      | -4      | -1      | -4      |
| 7                              | 33     | 2      | 10     | 16     | 23     | 35     | 2      | -12    | 6      | 23      | 4       | 15      | 7        | 49     | 0      | -7     | 4      | 4      | 49     | 3      | -15    | 3      | -7      | 0       | -3      |
| 8                              | 33     | 2      | 9      | 22     | 25     | 28     | 3      | -12    | 3      | 25      | 5       | 15      | 8        | 47     | -1     | -7     | 9      | 5      | 33     | 1      | -16    | 4      | -10     | 2       | -2      |
| 9                              | 32     | 5      | 9      | 22     | 22     | 16     | 3      | -8     | 3      | 22      | 7       | 17      | 9        | 36     | 1      | -6     | 7      | 12     | 22     | 2      | -16    | 4      | -9      | 2       | -3      |
| 10                             | 32     | 5      | 9      | 15     | 25     | 13     | 3      | -7     | 3      | 25      | 8       | 19      | 10       | 28     | 3      | -4     | 10     | 16     | 15     | 2      | -14    | 4      | -5      | 3       | -1      |
| 11                             | 29     | 7      | 11     | 15     | 30     | 13     | 4      | -3     | 4      | 30      | 11      | 22      | 11       | 30     | 5      | -2     | 8      | 20     | 3      | 1      | -11    | 4      | -3      | 0       | 2       |
| 12                             | 27     | 9      | 12     | 14     | 31     | 10     | 6      | -1     | 5      | 31      | 12      | 23      | 12       | 29     | 7      | -1     | 10     | 21     | 0      | -1     | -7     | 4      | 0       | -1      | 4       |
| 13                             | 26     | 10     | 12     | 16     | 32     | 11     | 6      | 3      | 6      | 32      | 10      | 20      | 13       | 28     | 8      | 0      | 11     | 23     | 0      | 4      | -3     | 2      | 3       | -3      | 6       |
| 14                             | 23     | 11     | 15     | 14     | 32     | 9      | 6      | 4      | 5      | 32      | 10      | 17      | 14       | 24     | 9      | 1      | 14     | 20     | 2      | 1      | 3      | 7      | -2      | 5       |         |
| 15                             | 21     | 11     | 14     | 12     | 30     | 6      | 5      | 7      | 3      | 30      | 10      | 12      | 15       | 18     | 9      | 3      | 13     | 18     | 3      | 1      | 3      | 2      | 7       | 0       | 4       |
| 16                             | 18     | 10     | 14     | 10     | 27     | 6      | 5      | 6      | 5      | 27      | 10      | 7       | 16       | 14     | 7      | 4      | 13     | 16     | 4      | -1     | 5      | 1      | 8       | 2       | 4       |
| 17                             | 16     | 17     | 12     | 7      | 23     | 5      | 6      | 6      | 4      | 23      | 10      | 3       | 17       | 9      | 7      | 5      | 8      | 18     | 3      | -2     | 6      | 2      | 7       | 3       | 4       |
| 18                             | 14     | 15     | 11     | 4      | 22     | 7      | 5      | 7      | 5      | 22      | 10      | 4       | 18       | 7      | 5      | 5      | 6      | 15     | 2      | -3     | 8      | 2      | 8       | 4       | 1       |
| 19                             | 11     | 7      | 8      | 2      | 23     | 5      | 5      | 5      | 5      | 23      | 10      | 4       | 19       | 4      | 5      | 4      | 2      | 12     | 2      | -2     | 10     | 2      | 9       | 3       | -1      |
| 20                             | 9      | 6      | 6      | 2      | 20     | 3      | 4      | 6      | 5      | 20      | 10      | 3       | 20       | 2      | 2      | 4      | 1      | 8      | 1      | -4     | 9      | 3      | 8       | 4       | -3      |
| 21                             | 9      | 5      | 4      | -2     | 19     | 5      | 3      | 6      | 3      | 19      | 7       | 2       | 21       | 0      | 2      | 4      | -1     | 6      | 0      | -2     | 9      | 2      | 8       | 5       | -5      |
| 22                             | 9      | 6      | 4      | -3     | 18     | 5      | 0      | 6      | 3      | 18      | 7       | 4       | 22       | 0      | 0      | 2      | -3     | 2      | -2     | 0      | 7      | 2      | 6       | 4       | -4      |
| 23                             | 9      | 3      | 2      | -3     | 16     | 4      | 0      | 6      | 3      | 16      | 7       | 6       | 23       | -1     | -1     | 1      | -3     | 2      | -1     | -2     | 8      | 2      | 7       | 4       | -4      |
| 24                             | 10     | 4      | 1      | -3     | 15     | 3      | 2      | 7      | 3      | 15      | 8       | 5       | 24       | 0      | -2     | 1      | -3     | 1      | -1     | -3     | 7      | 2      | 6       | 4       | -7      |
| 25                             | 10     | 3      | 0      | -4     | 14     | 6      | 1      | 7      | 3      | 14      | 8       | 5       | 25       | 0      | -2     | 0      | -4     | 1      | -4     | -3     | 8      | 2      | 6       | 3       | -7      |
| 26                             | 11     | 2      | -1     | -5     | 13     | 6      | 3      | 5      | 4      | 13      | 7       | 4       | 26       | 0      | -3     | -1     | -5     | 0      | -2     | -4     | 7      | 2      | 6       | 2       | -6      |
| 27                             | 12     | 2      | 0      | -5     | 12     | 3      | 2      | 7      | 5      | 12      | 5       | 6       | 27       | 0      | -3     | -2     | -5     | 0      | -4     | -2     | 4      | 2      | 5       | 2       | -4      |
| 28                             | 13     | 3      | 0      | -4     | 12     | 1      | 2      | 5      | 2      | 12      | 3       | 7       | 28       | 1      | -3     | -2     | -6     | 0      | -3     | 2      | 3      | 3      | 4       | 0       | -5      |
| 29                             | 14     | 3      | 2      | -4     | 12     | 1      | 1      | 6      | 4      | 12      | 2       | 5       | 29       | 2      | -3     | -2     | -5     | 1      | -3     | -1     | 2      | 3      | 3       | -1      | -5      |
| 30                             | 14     | 2      | 2      | -4     | 11     | 1      | 1      | 7      | 3      | 11      | 2       | 5       | 30       | 3      | -3     | -2     | -5     | 0      | -3     | -2     | 2      | 3      | 4       | -1      | -2      |

| Control  |        |        |        |        |        |        |        |        |        |         |         | HF-rEF MAP Time Course (Fig. 1F) |        |        |        |        |        |        |        |        |        |    |         |         |
|----------|--------|--------|--------|--------|--------|--------|--------|--------|--------|---------|---------|----------------------------------|--------|--------|--------|--------|--------|--------|--------|--------|--------|----|---------|---------|
| TIME (s) | Rat #1 | Rat #2 | Rat #3 | Rat #4 | Rat #5 | Rat #6 | Rat #7 | Rat #8 | Rat #9 | Rat #10 | Rat #11 | TIME (s)                         | Rat #1 | Rat #2 | Rat #3 | Rat #4 | Rat #5 | PcTx-1 |        |        |        |    | Rat #10 | Rat #11 |
|          |        |        |        |        |        |        |        |        |        |         |         |                                  |        |        |        |        |        | Rat #6 | Rat #7 | Rat #8 | Rat #9 |    |         |         |
| 0        | 0      | 0      | 0      | 0      | 0      | 0      | 0      | 0      | 0      | 0       | 0       | 0                                | 0      | 0      | 0      | 0      | 0      | 0      | 0      | 0      | 0      | 0  | 0       |         |
| 1        | 0      | -1     | 1      | 0      | 3      | -1     | 4      | 2      | 1      | 8       | 5       | 1                                | -3     | -1     | 0      | -2     | 2      | 1      | 1      | 3      | 2      | 3  | 3       |         |
| 2        | 0      | 0      | 3      | 1      | 6      | 0      | 4      | 4      | 3      | 8       | 6       | 2                                | 3      | -3     | 1      | 2      | 4      | 3      | -1     | 3      | 3      | 3  | 3       |         |
| 3        | 0      | 2      | -1     | 2      | 17     | 3      | 5      | 4      | 4      | 13      | 27      | 3                                | 6      | -1     | 2      | 4      | 11     | 7      | -2     | 2      | 0      | 3  | 2       |         |
| 4        | 0      | 5      | -11    | 3      | 24     | 12     | 3      | 5      | 7      | 37      | 64      | 4                                | 6      | 0      | -5     | 7      | 17     | 16     | -1     | 2      | -5     | 6  | 30      |         |
| 5        | 3      | 12     | -16    | 4      | 35     | 14     | 5      | 14     | 0      | 52      | 75      | 5                                | 10     | 4      | -20    | 9      | 27     | 16     | -2     | 2      | -10    | 8  | 42      |         |
| 6        | 14     | 18     | -5     | 5      | 38     | 10     | 7      | 17     | -6     | 52      | 52      | 6                                | 14     | 11     | -24    | 11     | 27     | 15     | -3     | 0      | -12    | 8  | 27      |         |
| 7        | 15     | 22     | 4      | 6      | 36     | 7      | 6      | 19     | -11    | 41      | 19      | 7                                | 11     | 11     | -20    | 13     | 22     | 10     | -4     | -1     | -10    | 7  | 4       |         |
| 8        | 9      | 22     | 17     | 7      | 24     | 7      | 5      | 17     | -13    | 20      | 1       | 8                                | 4      | 10     | -14    | 15     | 1      | 8      | -2     | -1     | -8     | 7  | 2       |         |
| 9        | 4      | 21     | 18     | 7      | 6      | 8      | 7      | 13     | -11    | 16      | -3      | 9                                | 3      | 8      | 1      | 16     | -14    | 8      | 1      | 1      | -5     | 10 | 0       |         |
| 10       | 6      | 19     | 11     | 7      | 5      | 9      | 10     | 10     | -7     | 13      | -2      | 10                               | 4      | 8      | 3      | 16     | -15    | 9      | 8      | 4      | -2     | 11 | 0       |         |
| 11       | 10     | 17     | 9      | 7      | 1      | 15     | 13     | 8      | 1      | 18      | 0       | 11                               | 5      | 6      | 5      | 16     | -15    | 9      | 10     | 4      | 1      | 12 | 3       |         |
| 12       | 11     | 15     | 9      | 7      | 6      | 16     | 16     | 7      | 6      | 20      | 2       | 12                               | 8      | 5      | 8      | 15     | -6     | 13     | 10     | 4      | 4      | 10 | 7       |         |
| 13       | 12     | 11     | 8      | 7      | 12     | 15     | 17     | 8      | 7      | 22      | 2       | 13                               | 9      | 4      | 7      | 15     | -10    | 14     | 10     | 5      | 4      | 6  | 7       |         |
| 14       | 12     | 11     | 8      | 8      | 12     | 12     | 17     | 8      | 6      | 23      | 1       | 14                               | 8      | 2      | 9      | 15     | -2     | 12     | 9      | 3      | 3      | 6  | 6       |         |
| 15       | 10     | 11     | 10     | 7      | 1      | 8      | 16     | 7      | 6      | 18      | -1      | 15                               | 9      | 1      | 9      | 15     | -2     | 7      | 7      | 3      | 2      | 4  | 6       |         |
| 16       | 8      | 9      | 2      | 7      | 6      | 6      | 13     | 6      | 4      | 22      | -2      | 16                               | 7      | 0      | 9      | 14     | 1      | 6      | 7      | 2      | 2      | 1  | 5       |         |
| 17       | 5      | 7      | 2      | 7      | 7      | 4      | 11     | 4      | 3      | 25      | -2      | 17                               | 4      | -1     | 8      | 13     | 1      | 4      | 5      | 0      | 1      | -2 | 1       |         |
| 18       | 5      | 4      | 2      | 7      | -2     | 9      | 10     | 4      | 3      | 29      | -3      | 18                               | 2      | -1     | 2      | 12     | -6     | 2      | 3      | 1      | 0      | -1 | 1       |         |
| 19       | 5      | 1      | 3      | 7      | 0      | 13     | 9      | 3      | 1      | 25      | -4      | 19                               | 1      | -2     | 1      | 11     | -5     | 7      | 0      | -1     | -1     | -1 | -3      |         |
| 20       | 7      | 0      | 2      | 6      | 0      | 12     | 8      | 1      | 0      | 29      | -5      | 20                               | 0      | -3     | 1      | 11     | -8     | 9      | 0      | -1     | -2     | -1 | -4      |         |
| 21       | 8      | -1     | 2      | 6      | -3     | 10     | 5      | 0      | -4     | 28      | -5      | 21                               | 0      | -3     | 0      | 10     | -8     | 10     | 0      | -3     | -2     | 0  | -2      |         |
| 22       | 6      | -2     | 0      | 6      | -9     | 7      | 4      | -1     | -6     | 31      | -4      | 22                               | 0      | -2     | -2     | 9      | -9     | 6      | -1     | -3     | -2     | -1 | -2      |         |
| 23       | 7      | -3     | -3     | 5      | -4     | 4      | 3      | -2     | -8     | 31      | -3      | 23                               | 1      | -2     | -6     | 8      | -8     | 4      | -3     | -3     | -3     | -1 | -1      |         |
| 24       | 8      | -3     | -1     | 5      | -5     | 3      | 3      | -3     | -9     | 31      | -3      | 24                               | 3      | -2     | -5     | 7      | -11    | 0      | -2     | -3     | -1     | -1 | -3      |         |
| 25       | 7      | -4     | 0      | 5      | -4     | 3      | 3      | -3     | -9     | 32      | -4      | 25                               | 3      | -1     | -7     | 7      | -9     | 0      | -2     | -4     | 1      | 0  | -2      |         |
| 26       | 8      | -4     | 0      | 4      | 0      | 3      | 3      | -3     | -10    | 35      | -4      | 26                               | 4      | 1      | -7     | 6      | -3     | -1     | -2     | -4     | 4      | -1 | -4      |         |
| 27       | 7      | -4     | 1      | 4      | -4     | 3      | 2      | -4     | -10    | 31      | -2      | 27                               | 4      | 4      | -10    | 5      | -3     | -1     | 0      | -4     | 6      | 0  | -2      |         |
| 28       | 8      | -4     | -1     | 4      | -5     | 4      | 2      | -4     | -11    | 33      | -1      | 28                               | 4      | 7      | -11    | 5      | -6     | -2     | -1     | -4     | 7      | -1 | 1       |         |
| 29       | 10     | -4     | -2     | 4      | 4      | 4      | 3      | -3     | -10    | 37      | 1       | 29                               | 4      | 8      | -8     | 5      | -8     | -2     | -1     | -3     | 7      | -2 | 3       |         |
| 30       | 13     | -2     | -2     | 4      | 4      | 5      | 3      | -2     | -9     | 39      | -1      | 30                               | 3      | 10     | -7     | 5      | -10    | -2     | -1     | -2     | 8      | -2 | 4       |         |

SHAM RSNA Time Course (Fig. 2A)

| TIME (s) | Control |        |        |        |        |        |        | ASIC1a Blockade |        |        |        |        |        |        |
|----------|---------|--------|--------|--------|--------|--------|--------|-----------------|--------|--------|--------|--------|--------|--------|
|          | Rat #1  | Rat #2 | Rat #3 | Rat #4 | Rat #5 | Rat #6 | Rat #7 | Rat #1          | Rat #2 | Rat #3 | Rat #4 | Rat #5 | Rat #6 | Rat #7 |
| 0        | 0       | 0      | 0      | 0      | 0      | 0      | 0      | 0               | 0      | 0      | 0      | 0      | 0      | 0      |
| 1        | 121     | 155    | 177    | 37     | -2     | 84     | 50     | 149             | 170    | 143    | 34     | -12    | 101    | 31     |
| 2        | 78      | 189    | 181    | 33     | 24     | 90     | 26     | 100             | 244    | 72     | 20     | 12     | 73     | 29     |
| 3        | 85      | 133    | 246    | 7      | 29     | 73     | 28     | 103             | 244    | 29     | 14     | 5      | 88     | 27     |
| 4        | 73      | 195    | 98     | 15     | 27     | 79     | 52     | 79              | 218    | 29     | 18     | 9      | 72     | 30     |
| 5        | 105     | 154    | -115   | 22     | 30     | 65     | 38     | 81              | 189    | -16    | 16     | 8      | 73     | 33     |
| 6        | 82      | 110    | -8     | 9      | 30     | 45     | 35     | 96              | 202    | 38     | 20     | 3      | 81     | 27     |
| 7        | 89      | 88     | 21     | 9      | 35     | 66     | 30     | 88              | 187    | 17     | 4      | 4      | 78     | 29     |
| 8        | 59      | 87     | 36     | 30     | 38     | 44     | 35     | 91              | 164    | -1     | 21     | 10     | 78     | 23     |
| 9        | 55      | 94     | -84    | 28     | 28     | 24     | 37     | 80              | 161    | 38     | 4      | 2      | 56     | 20     |
| 10       | 68      | 86     | 50     | 12     | 32     | 47     | 42     | 89              | 144    | 37     | 7      | 7      | 83     | 21     |
| 11       | 52      | 94     | -61    | 27     | 41     | 31     | 41     | 66              | 130    | 8      | 13     | 6      | 40     | 14     |
| 12       | 77      | 79     | 43     | 15     | 20     | 28     | 26     | 60              | 131    | -8     | 13     | 13     | 56     | 10     |
| 13       | 81      | 73     | -28    | 18     | 29     | 24     | 25     | 74              | 134    | 21     | 7      | 11     | 52     | 11     |
| 14       | 48      | 78     | 49     | 31     | 29     | 24     | 33     | 74              | 94     | 26     | 12     | 17     | 44     | 16     |
| 15       | 69      | 60     | -16    | 17     | 28     | 18     | 31     | 61              | 77     | 26     | 17     | 6      | 64     | 19     |
| 16       | 42      | 77     | 11     | 28     | 26     | 23     | 34     | 74              | 82     | -11    | 4      | 10     | 37     | 6      |
| 17       | 58      | 60     | 8      | 28     | 19     | 0      | 27     | 62              | 68     | 6      | 7      | 1      | 47     | 9      |
| 18       | 62      | 52     | -38    | 6      | 30     | 28     | 35     | 63              | 62     | 13     | 13     | 10     | 34     | 8      |
| 19       | 45      | 73     | 13     | 19     | 22     | 15     | 35     | 60              | 63     | -7     | 4      | 10     | 45     | -1     |
| 20       | 23      | 56     | 24     | 16     | 22     | 0      | 10     | 72              | 59     | -6     | 16     | 20     | 46     | 7      |
| 21       | 36      | 52     | 35     | 21     | 28     | 21     | 20     | 88              | 41     | 17     | 15     | 8      | 31     | 12     |
| 22       | 37      | 53     | 1      | 28     | 17     | 9      | 9      | 33              | 30     | -3     | 24     | 12     | 40     | 15     |
| 23       | 28      | 54     | 31     | 15     | 27     | 26     | 17     | 26              | 30     | -11    | 6      | 18     | 50     | 13     |
| 24       | 39      | 50     | -13    | 26     | 21     | 8      | 22     | 39              | 4      | 20     | 11     | 11     | 43     | 9      |
| 25       | 1       | 55     | 32     | 25     | 23     | 20     | 14     | 35              | 5      | -4     | 4      | 14     | 44     | 7      |
| 26       | 8       | 44     | 15     | 22     | 29     | 21     | 8      | 26              | -23    | 26     | 9      | 9      | 35     | 6      |
| 27       | 4       | 57     | 31     | 28     | 22     | 6      | 1      | 31              | -19    | 47     | 19     | 15     | 37     | 8      |
| 28       | 10      | 42     | 48     | 29     | 18     | 24     | 12     | 31              | -29    | 8      | 27     | 5      | 36     | 15     |
| 29       | -8      | 54     | 30     | 18     | 23     | 20     | 12     | 26              | 24     | 15     | 12     | 8      | 33     | 16     |
| 30       | 4       | 55     | 79     | 13     | 30     | -2     | 16     | 26              | 24     | 15     | 12     | 8      | 33     | 16     |

| TIME (s) | Control |        |        |        |        |        |        |        | ASIC1a Blockade |        |        |        |        |        |        |        |
|----------|---------|--------|--------|--------|--------|--------|--------|--------|-----------------|--------|--------|--------|--------|--------|--------|--------|
|          | Rat #1  | Rat #2 | Rat #3 | Rat #4 | Rat #5 | Rat #6 | Rat #7 | Rat #8 | Rat #1          | Rat #2 | Rat #3 | Rat #4 | Rat #5 | Rat #6 | Rat #7 | Rat #8 |
| 0        | 0       | 0      | 0      | 0      | 0      | 0      | 0      | 0      | 0               | 0      | 0      | 0      | 0      | 0      | 0      | 0      |
| 1        | 77      | 263    | 91     | 62     | 100    | 108    | 204    | 198    | 59              | 41     | 62     | 27     | 141    | 38     | 93     | 162    |
| 2        | 49      | 156    | 43     | 24     | 69     | 129    | 210    | 61     | 64              | -5     | 23     | -2     | 100    | 55     | 72     | 75     |
| 3        | 39      | 165    | 62     | 10     | 48     | 140    | 220    | 91     | 32              | 48     | 47     | 1      | 78     | 56     | 81     | 11     |
| 4        | 46      | 128    | 89     | 23     | 52     | 123    | 175    | 112    | 37              | 106    | 32     | 8      | 73     | 68     | 64     | 39     |
| 5        | 24      | 130    | 103    | 28     | 30     | 117    | 128    | 86     | 30              | 98     | 49     | 12     | 53     | 36     | 36     | 8      |
| 6        | 32      | 181    | 80     | 60     | 13     | 91     | 104    | 71     | 30              | 83     | 54     | 7      | 66     | 67     | 54     | 8      |
| 7        | 28      | 162    | 84     | 35     | 50     | 75     | 121    | 42     | 17              | 53     | 31     | -7     | 82     | 40     | 35     | 18     |
| 8        | 24      | 148    | 86     | 49     | 21     | 76     | 122    | 25     | 26              | 36     | 40     | 4      | 69     | 34     | 26     | 13     |
| 9        | 11      | 122    | 40     | 11     | 43     | 61     | 87     | 14     | 14              | 92     | 41     | 4      | 68     | 31     | 24     | 22     |
| 10       | 18      | 65     | 68     | -7     | 22     | 73     | 25     | 51     | 33              | -22    | 36     | 6      | 64     | 37     | 19     | -8     |
| 11       | 18      | 30     | 73     | -2     | 27     | 60     | 81     | 25     | 21              | 36     | 29     | -6     | 46     | 29     | 17     | 16     |
| 12       | 13      | -4     | 38     | 5      | 18     | 67     | 65     | 15     | 3               | 16     | 42     | 10     | 54     | 40     | 17     | 7      |
| 13       | 15      | -25    | 8      | 12     | 21     | 57     | -6     | 26     | -6              | 40     | 33     | 7      | 59     | 30     | 10     | 4      |
| 14       | 26      | -79    | 60     | 1      | 27     | 62     | 48     | 30     | -4              | -9     | 46     | 9      | 64     | 32     | 2      | 23     |
| 15       | 23      | -5     | 66     | -18    | 48     | 63     | -15    | 22     | -3              | 49     | 24     | -3     | 55     | 18     | 8      | 17     |
| 16       | 29      | -59    | 36     | -16    | 28     | 56     | -26    | 30     | -1              | 3      | 27     | -4     | 79     | 36     | 1      | 7      |
| 17       | 18      | -50    | 78     | -14    | 31     | 47     | -1     | 20     | -1              | 7      | 43     | -7     | 60     | 21     | 30     | 22     |
| 18       | 19      | -58    | 53     | -7     | 28     | 36     | -2     | 29     | 3               | 15     | 25     | 11     | 58     | 9      | 6      | 13     |
| 19       | 16      | -39    | 19     | -23    | 35     | 41     | -25    | 41     | -11             | 19     | 19     | 2      | 68     | 16     | 8      | 14     |
| 20       | 19      | 55     | 50     | -22    | 29     | 32     | -31    | 18     | -10             | -11    | 32     | 1      | 73     | 18     | 31     | 18     |
| 21       | 23      | 6      | 63     | -21    | 34     | 34     | -1     | 45     | 1               | 24     | 33     | -11    | 79     | 24     | 15     | 20     |
| 22       | 19      | 37     | 58     | -5     | 37     | 28     | -33    | 32     | -5              | -8     | 27     | 25     | 64     | 27     | 3      | -11    |
| 23       | 14      | 42     | 84     | -17    | 30     | 15     | -18    | 15     | -7              | -11    | 28     | -13    | 84     | 22     | 0      | 22     |
| 24       | 20      | 16     | 44     | -19    | 32     | 32     | -39    | 32     | -6              | 0      | 10     | 6      | 58     | 19     | 0      | 33     |
| 25       | 12      | 55     | 68     | -20    | 56     | 23     | -65    | 42     | -10             | -26    | 20     | 1      | 81     | 11     | 1      | 18     |
| 26       | 15      | 15     | 57     | -15    | 18     | 24     | -30    | 48     | -5              | 6      | 22     | -4     | 54     | 22     | -2     | 12     |
| 27       | 12      | 58     | 36     | -21    | 40     | 38     | -15    | 38     | -2              | -36    | -6     | -5     | 71     | 25     | -2     | 4      |
| 28       | 11      | 54     | 53     | -26    | 60     | 28     | -3     | 48     | -12             | -44    | 19     | 5      | 75     | 9      | 13     | 9      |
| 29       | 17      | 59     | 45     | -24    | 57     | 39     | -32    | 40     | -19             | 6      | 36     | -11    | 47     | 11     | -7     | 20     |
| 30       | 1       | 58     | 40     | -20    | 57     | 39     | -32    | 40     | 1               | -15    | 12     | 1      | 47     | 11     | -7     | 20     |

| SHAM MAP Time Course (Fig. 2C) |         |        |        |        |        |        |        |                 |        |        |        |        |        |        |  |
|--------------------------------|---------|--------|--------|--------|--------|--------|--------|-----------------|--------|--------|--------|--------|--------|--------|--|
| TIME (s)                       | Control |        |        |        |        |        |        | ASIC1a Blockade |        |        |        |        |        |        |  |
|                                | Rat #1  | Rat #2 | Rat #3 | Rat #4 | Rat #5 | Rat #6 | Rat #7 | Rat #1          | Rat #2 | Rat #3 | Rat #4 | Rat #5 | Rat #6 | Rat #7 |  |
| 0                              | 0       | 0      | 0      | 0      | 0      | 0      | 0      | 0               | 0      | 0      | 0      | 0      | 0      | 0      |  |
| 1                              | 2       | 1      | 9      | 3      | 0      | 5      | -1     | 5               | -1     | 5      | 7      | 9      | 0      | -1     |  |
| 2                              | 14      | -2     | 13     | -1     | 11     | 4      | 0      | 5               | 3      | 8      | -2     | 5      | 0      | -5     |  |
| 3                              | 19      | -2     | 28     | 26     | 3      | 7      | -6     | 11              | 3      | 16     | 8      | -3     | 1      | -1     |  |
| 4                              | 27      | -1     | 46     | 31     | 3      | 7      | -1     | 18              | 3      | 20     | 19     | -3     | 4      | 1      |  |
| 5                              | 27      | -2     | 49     | 31     | 5      | 10     | 4      | 27              | 3      | 23     | 22     | -3     | 6      | 1      |  |
| 6                              | 31      | -2     | 47     | 32     | 6      | 12     | 6      | 30              | 3      | 24     | 24     | -2     | 9      | 5      |  |
| 7                              | 32      | 2      | 31     | 35     | 9      | 13     | 11     | 28              | 2      | 26     | 28     | -3     | 10     | 8      |  |
| 8                              | 38      | 5      | 32     | 35     | 9      | 17     | 13     | 34              | 5      | 25     | 28     | -2     | 14     | 11     |  |
| 9                              | 40      | 9      | 45     | 34     | 10     | 21     | 15     | 36              | 4      | 23     | 26     | -3     | 16     | 14     |  |
| 10                             | 34      | 10     | 34     | 29     | 10     | 21     | 16     | 36              | 1      | 26     | 25     | -1     | 17     | 14     |  |
| 11                             | 36      | 12     | 37     | 19     | 12     | 22     | 18     | 35              | 3      | 28     | 19     | 0      | 19     | 14     |  |
| 12                             | 35      | 14     | 31     | 15     | 12     | 23     | 19     | 35              | 3      | 28     | 22     | 0      | 20     | 14     |  |
| 13                             | 38      | 13     | 31     | 10     | 12     | 21     | 20     | 32              | 0      | 20     | 19     | 1      | 18     | 13     |  |
| 14                             | 40      | 15     | 25     | 8      | 10     | 22     | 18     | 31              | 0      | 21     | 20     | 1      | 16     | 13     |  |
| 15                             | 41      | 19     | 33     | 0      | 9      | 21     | 17     | 31              | 3      | 23     | 18     | 0      | 16     | 11     |  |
| 16                             | 41      | 19     | 32     | 4      | 7      | 20     | 18     | 31              | 0      | 22     | 16     | -1     | 16     | 7      |  |
| 17                             | 41      | 19     | 34     | 1      | 6      | 20     | 17     | 31              | 2      | 22     | 18     | -3     | 16     | 7      |  |
| 18                             | 43      | 19     | 36     | -1     | 5      | 18     | 16     | 31              | 2      | 21     | 18     | -3     | 13     | 6      |  |
| 19                             | 43      | 18     | 32     | 9      | 4      | 18     | 15     | 33              | 0      | 23     | 13     | -2     | 12     | 6      |  |
| 20                             | 43      | 18     | 31     | 6      | 3      | 19     | 14     | 32              | 1      | 23     | 16     | -2     | 12     | 5      |  |
| 21                             | 41      | 16     | 34     | 3      | 4      | 17     | 14     | 31              | 3      | 19     | 11     | -1     | 12     | 5      |  |
| 22                             | 41      | 17     | 39     | 4      | 5      | 17     | 12     | 29              | -1     | 20     | 14     | 0      | 9      | 6      |  |
| 23                             | 40      | 17     | 34     | 7      | 5      | 17     | 12     | 29              | 0      | 19     | 16     | 2      | 9      | 6      |  |
| 24                             | 40      | 17     | 34     | 7      | 5      | 16     | 12     | 26              | 2      | 17     | 18     | 2      | 9      | 6      |  |
| 25                             | 37      | 17     | 32     | 3      | 5      | 16     | 13     | 28              | 2      | 17     | 14     | 2      | 10     | 7      |  |
| 26                             | 33      | 17     | 34     | 5      | 5      | 15     | 11     | 27              | 2      | 18     | 15     | 3      | 10     | 6      |  |
| 27                             | 33      | 17     | 35     | 7      | 4      | 16     | 12     | 27              | 1      | 18     | 13     | 4      | 10     | 3      |  |
| 28                             | 31      | 14     | 37     | 6      | 5      | 15     | 11     | 26              | -2     | 19     | 13     | 3      | 9      | 4      |  |
| 29                             | 30      | 13     | 37     | 9      | 4      | 16     | 10     | 26              | -5     | 22     | 13     | 4      | 9      | 5      |  |
| 30                             | 27      | 15     | 36     | 12     | 5      | 15     | 9      | 25              | 5      | 22     | 12     | 4      | 10     | 6      |  |

HF-rEF MAP Time Course (Fig. 2D)

| TIME (s) | Control |        |        |        |        |        |        |        | ASIC1a Blockade |        |        |        |        |        |        |        |
|----------|---------|--------|--------|--------|--------|--------|--------|--------|-----------------|--------|--------|--------|--------|--------|--------|--------|
|          | Rat #1  | Rat #2 | Rat #3 | Rat #4 | Rat #5 | Rat #6 | Rat #7 | Rat #8 | Rat #1          | Rat #2 | Rat #3 | Rat #4 | Rat #5 | Rat #6 | Rat #7 | Rat #8 |
| 0        | 0       | 0      | 0      | 0      | 0      | 0      | 0      | 2      | 0               | 0      | 0      | 0      | 0      | 0      | 0      | 0      |
| 1        | 11      | 19     | 2      | 3      | 3      | 6      | 8      | 5      | -5              | -3     | 4      | 11     | 9      | 3      | 3      | 3      |
| 2        | 16      | 22     | 1      | 5      | 12     | 12     | -3     | 7      | 11              | 8      | 4      | 13     | 10     | 11     | -5     | 5      |
| 3        | 12      | 11     | -1     | 11     | 12     | 19     | -3     | 3      | 12              | 7      | -1     | 7      | 12     | 16     | -5     | -3     |
| 4        | 10      | 22     | 4      | 13     | 10     | 26     | 5      | 5      | 12              | 16     | 7      | 0      | 13     | 21     | 5      | 0      |
| 5        | 11      | 29     | 9      | 16     | 11     | 33     | 11     | 21     | 16              | 24     | 13     | 3      | 13     | 27     | 8      | 1      |
| 6        | 13      | 34     | 16     | 14     | 13     | 37     | 13     | 27     | 16              | 31     | 19     | 3      | 14     | 27     | 7      | 7      |
| 7        | 22      | 37     | 21     | 16     | 12     | 39     | 14     | 30     | 17              | 33     | 22     | 4      | 14     | 31     | 7      | 12     |
| 8        | 21      | 39     | 25     | 16     | 13     | 42     | 14     | 32     | 17              | 35     | 24     | 4      | 14     | 31     | 9      | 15     |
| 9        | 17      | 39     | 29     | 19     | 12     | 43     | 17     | 32     | 14              | 35     | 28     | 5      | 15     | 27     | 11     | 9      |
| 10       | 15      | 39     | 34     | 18     | 12     | 46     | 17     | 29     | 16              | 41     | 31     | 6      | 15     | 26     | 11     | 16     |
| 11       | 10      | 37     | 40     | 18     | 12     | 45     | 18     | 26     | 21              | 37     | 32     | 7      | 14     | 29     | 9      | 17     |
| 12       | 9       | 38     | 41     | 16     | 12     | 44     | 19     | 25     | 18              | 35     | 33     | 7      | 15     | 35     | 9      | 15     |
| 13       | 10      | 36     | 40     | 16     | 11     | 41     | 20     | 21     | 10              | 36     | 31     | 9      | 14     | 33     | 8      | 12     |
| 14       | 9       | 34     | 38     | 13     | 11     | 41     | 15     | 19     | 4               | 30     | 29     | 9      | 13     | 29     | 8      | 7      |
| 15       | 8       | 34     | 37     | 14     | 10     | 46     | 14     | 18     | 3               | 30     | 29     | 9      | 13     | 28     | 6      | 3      |
| 16       | 8       | 30     | 36     | 9      | 10     | 44     | 16     | 17     | 4               | 20     | 28     | 6      | 12     | 27     | 5      | 7      |
| 17       | 12      | 28     | 36     | 7      | 9      | 44     | 14     | 14     | 5               | 20     | 27     | 7      | 11     | 27     | 4      | 2      |
| 18       | 14      | 32     | 36     | 8      | 8      | 38     | 14     | 13     | 8               | 22     | 26     | 6      | 10     | 27     | 5      | 2      |
| 19       | 12      | 30     | 34     | 9      | 8      | 40     | 16     | 13     | 8               | 11     | 25     | 6      | 10     | 27     | 6      | 3      |
| 20       | 9       | 31     | 30     | 9      | 8      | 41     | 14     | 12     | 6               | 21     | 26     | 5      | 9      | 23     | 5      | 11     |
| 21       | 7       | 30     | 27     | 8      | 8      | 41     | 12     | 10     | 0               | 21     | 25     | 3      | 9      | 25     | 8      | 8      |
| 22       | 9       | 30     | 27     | 8      | 8      | 39     | 12     | 9      | 0               | 14     | 26     | 6      | 9      | 25     | 8      | 11     |
| 23       | 8       | 29     | 28     | 8      | 8      | 43     | 13     | 9      | 1               | 20     | 27     | 4      | 8      | 26     | 8      | 8      |
| 24       | 5       | 28     | 28     | 8      | 8      | 39     | 12     | 9      | 5               | 22     | 27     | 4      | 8      | 28     | 7      | 5      |
| 25       | 5       | 29     | 28     | 6      | 8      | 37     | 12     | 9      | 5               | 23     | 27     | 3      | 8      | 29     | 6      | 0      |
| 26       | 4       | 30     | 28     | 7      | 8      | 31     | 10     | 9      | 5               | 23     | 28     | 2      | 9      | 27     | 7      | 3      |
| 27       | 4       | 30     | 27     | 7      | 8      | 31     | 9      | 10     | 3               | 17     | 26     | 3      | 9      | 26     | 7      | 8      |
| 28       | 4       | 27     | 26     | 7      | 7      | 33     | 10     | 12     | 3               | 27     | 26     | 3      | 8      | 22     | 6      | 8      |
| 29       | 3       | 25     | 26     | 5      | 8      | 35     | 10     | 14     | -1              | 20     | 24     | 1      | 10     | 22     | 6      | 3      |
| 30       | 3       | 26     | 24     | 4      | 8      | 36     | 11     | 15     | -1              | 15     | 23     | 1      | 9      | 22     | 6      | 4      |



SHAM HR Time Course (Fig. 2E)

| TIME (s) | Control |        |        |        |        |        |        | ASIC1a Blockade |        |        |        |        |        |        |
|----------|---------|--------|--------|--------|--------|--------|--------|-----------------|--------|--------|--------|--------|--------|--------|
|          | Rat #1  | Rat #2 | Rat #3 | Rat #4 | Rat #5 | Rat #6 | Rat #7 | Rat #1          | Rat #2 | Rat #3 | Rat #4 | Rat #5 | Rat #6 | Rat #7 |
| 0        | 0       | 0      | 0      | 0      | 0      | 0      | 0      | 0               | 0      | 0      | 0      | 0      | 0      | 0      |
| 1        | -1      | 3      | 14     | 2      | -3     | -3     | 1      | 1               | -4     | 14     | 0      | 5      | -7     | 2      |
| 2        | 5       | 9      | 45     | 3      | 2      | 8      | 5      | 9               | -5     | 30     | 4      | 11     | 6      | 6      |
| 3        | 16      | 17     | 59     | 5      | 14     | 18     | 5      | 15              | -4     | 37     | 6      | 9      | 8      | 5      |
| 4        | 17      | 23     | 60     | 7      | 9      | 25     | 5      | 20              | 3      | 38     | 6      | 9      | 4      | 5      |
| 5        | 18      | 23     | 60     | 7      | 6      | 34     | 5      | 23              | 0      | 37     | 5      | 3      | 12     | 5      |
| 6        | 19      | 3      | 60     | 7      | 0      | 44     | 6      | 29              | 5      | 36     | 6      | -2     | 20     | 5      |
| 7        | 24      | 9      | 58     | 8      | 12     | 47     | 5      | 31              | 8      | 39     | 7      | 11     | 17     | 7      |
| 8        | 25      | 19     | 53     | 8      | 12     | 42     | 7      | 33              | 0      | 32     | 7      | 11     | 14     | 7      |
| 9        | 26      | 19     | 46     | 8      | -6     | 45     | 7      | 36              | -1     | 30     | 6      | 1      | 17     | 5      |
| 10       | 27      | 23     | 40     | 9      | -2     | 42     | 7      | 39              | 5      | 26     | 6      | 8      | 17     | 5      |
| 11       | 28      | 28     | 41     | 8      | 11     | 46     | 9      | 37              | 5      | 26     | 6      | 12     | 7      | 7      |
| 12       | 30      | 28     | 41     | 9      | 4      | 40     | 10     | 36              | 4      | 25     | 6      | 12     | 16     | 8      |
| 13       | 33      | 27     | 46     | 9      | 5      | 40     | 11     | 34              | 4      | 27     | 6      | 2      | 15     | 8      |
| 14       | 31      | 30     | 38     | 9      | 5      | 46     | 11     | 33              | 3      | 29     | 5      | 6      | 12     | 8      |
| 15       | 32      | 32     | 35     | 8      | 0      | 39     | 11     | 33              | 7      | 28     | 7      | 2      | 12     | 7      |
| 16       | 30      | 32     | 36     | 9      | 8      | 25     | 11     | 33              | 7      | 33     | 7      | 3      | 11     | 7      |
| 17       | 35      | 35     | 36     | 6      | 2      | 37     | 11     | 32              | 1      | 33     | 7      | 1      | 8      | 9      |
| 18       | 33      | 35     | 31     | 9      | 2      | 27     | 12     | 37              | 8      | 32     | 8      | 7      | 7      | 8      |
| 19       | 33      | 31     | 32     | 8      | 0      | 40     | 11     | 37              | 8      | 29     | 7      | 6      | 2      | 7      |
| 20       | 33      | 30     | 36     | 7      | 0      | 32     | 11     | 39              | -2     | 32     | 8      | 2      | 6      | 6      |
| 21       | 33      | 29     | 37     | 7      | 1      | 32     | 9      | 33              | 9      | 32     | 8      | 3      | 1      | 5      |
| 22       | 33      | 29     | 30     | 8      | -2     | 24     | 8      | 31              | 9      | 29     | 8      | 10     | 2      | 5      |
| 23       | 32      | 30     | 28     | 8      | 4      | 27     | 8      | 30              | 1      | 28     | 8      | 10     | -8     | 4      |
| 24       | 33      | 27     | 32     | 8      | -6     | 16     | 6      | 30              | 1      | 28     | 7      | 5      | -4     | 4      |
| 25       | 31      | 29     | 31     | 7      | -7     | 23     | 6      | 30              | 6      | 30     | 8      | 5      | -3     | 5      |
| 26       | 30      | 31     | 37     | 6      | -6     | 12     | 6      | 30              | 4      | 31     | 8      | 12     | -2     | 4      |
| 27       | 30      | 31     | 33     | 7      | -2     | 15     | 9      | 30              | 10     | 32     | 8      | 12     | -1     | 5      |
| 28       | 31      | 32     | 39     | 8      | -6     | 18     | 5      | 30              | 6      | 31     | 8      | 0      | -4     | 5      |
| 29       | 30      | 33     | 39     | 8      | 3      | 13     | 5      | 29              | 3      | 34     | 7      | 3      | -3     | 5      |
| 30       | 29      | 32     | 46     | 9      | -6     | 12     | 6      | 28              | 6      | 38     | 7      | 3      | -5     | 5      |

HF-rEF HR Time Course (Fig. 2F)

| TIME (s) | Control |        |        |        |        |        |        |        | ASIC1a Blockade |        |        |        |        |        |        |        |
|----------|---------|--------|--------|--------|--------|--------|--------|--------|-----------------|--------|--------|--------|--------|--------|--------|--------|
|          | Rat #1  | Rat #2 | Rat #3 | Rat #4 | Rat #5 | Rat #6 | Rat #7 | Rat #8 | Rat #1          | Rat #2 | Rat #3 | Rat #4 | Rat #5 | Rat #6 | Rat #7 | Rat #8 |
| 0        | 0       | 0      | 0      | 0      | 0      | 0      | 0      | 0      | 0               | 0      | 0      | 0      | 0      | 0      | 0      | 0      |
| 1        | 12      | 5      | -1     | 5      | -1     | -1     | 7      | 2      | -1              | 0      | 3      | 4      | 2      | 2      | 5      | 1      |
| 2        | 16      | 13     | 0      | 7      | 6      | 5      | 7      | 26     | 2               | 3      | 3      | 8      | 9      | 17     | 0      | 17     |
| 3        | 26      | 19     | 5      | 16     | 12     | 15     | 5      | 38     | 11              | 8      | 11     | 10     | 12     | 17     | 2      | 18     |
| 4        | 26      | 23     | 3      | 17     | 12     | 29     | 8      | 48     | 15              | 13     | 17     | 13     | 14     | 10     | 2      | 18     |
| 5        | 41      | 30     | 11     | 25     | 12     | 30     | 14     | 50     | 15              | 18     | 20     | 14     | 14     | 17     | 4      | 29     |
| 6        | 32      | 29     | 11     | 26     | 13     | 40     | 13     | 51     | 17              | 22     | 14     | 16     | 15     | 20     | 6      | 34     |
| 7        | 37      | 31     | 22     | 24     | 13     | 42     | 17     | 54     | 15              | 24     | 23     | 16     | 15     | 20     | 9      | 28     |
| 8        | 39      | 35     | 26     | 20     | 14     | 45     | 20     | 50     | 19              | 25     | 25     | 20     | 17     | 20     | 11     | 31     |
| 9        | 34      | 35     | 26     | 22     | 15     | 44     | 16     | 53     | 17              | 28     | 27     | 17     | 17     | 23     | 8      | 25     |
| 10       | 33      | 35     | 25     | 18     | 17     | 48     | 20     | 50     | 24              | 24     | 42     | 21     | 17     | 20     | 10     | 24     |
| 11       | 35      | 36     | 24     | 20     | 17     | 48     | 21     | 44     | 24              | 26     | 33     | 20     | 21     | 21     | 12     | 19     |
| 12       | 36      | 36     | 33     | 17     | 16     | 49     | 22     | 40     | 24              | 24     | 28     | 18     | 20     | 26     | 12     | 18     |
| 13       | 38      | 38     | 22     | 12     | 16     | 49     | 22     | 41     | 20              | 26     | 33     | 20     | 20     | 28     | 10     | 16     |
| 14       | 38      | 37     | 36     | 12     | 17     | 50     | 25     | 38     | 18              | 23     | 26     | 18     | 20     | 28     | 13     | 17     |
| 15       | 32      | 38     | 33     | 12     | 17     | 47     | 27     | 32     | 19              | 22     | 34     | 16     | 18     | 28     | 15     | 15     |
| 16       | 30      | 36     | 33     | 11     | 17     | 49     | 27     | 37     | 15              | 22     | 48     | 15     | 19     | 29     | 10     | 23     |
| 17       | 34      | 36     | 32     | 8      | 18     | 50     | 26     | 30     | 20              | 19     | 48     | 13     | 20     | 29     | 10     | 17     |
| 18       | 35      | 37     | 31     | 8      | 18     | 49     | 24     | 31     | 17              | 18     | 33     | 13     | 20     | 30     | 11     | 19     |
| 19       | 35      | 34     | 30     | 8      | 18     | 50     | 23     | 33     | 15              | 18     | 33     | 11     | 20     | 24     | 9      | 17     |
| 20       | 32      | 37     | 26     | 6      | 17     | 52     | 22     | 33     | 14              | 15     | 28     | 11     | 25     | 27     | 7      | 21     |
| 21       | 36      | 35     | 27     | 3      | 18     | 52     | 23     | 32     | 11              | 16     | 36     | 7      | 25     | 29     | 11     | 21     |
| 22       | 29      | 36     | 32     | 4      | 18     | 50     | 22     | 32     | 13              | 16     | 41     | 9      | 21     | 28     | 8      | 20     |
| 23       | 34      | 36     | 36     | 2      | 18     | 52     | 21     | 35     | 9               | 16     | 39     | 6      | 19     | 32     | 8      | 18     |
| 24       | 35      | 33     | 28     | 3      | 19     | 52     | 20     | 31     | 20              | 15     | 36     | 6      | 18     | 29     | 8      | 19     |
| 25       | 32      | 36     | 28     | 2      | 18     | 52     | 20     | 34     | 18              | 14     | 30     | 4      | 19     | 25     | 11     | 23     |
| 26       | 28      | 34     | 25     | -1     | 20     | 45     | 19     | 32     | 15              | 15     | 35     | 4      | 19     | 28     | 11     | 21     |
| 27       | 30      | 34     | 23     | 4      | 20     | 49     | 18     | 32     | 16              | 15     | 35     | 2      | 19     | 26     | 9      | 20     |
| 28       | 31      | 35     | 24     | 1      | 20     | 46     | 21     | 34     | 14              | 15     | 40     | 2      | 20     | 24     | 6      | 24     |
| 29       | 28      | 34     | 39     | 0      | 20     | 48     | 22     | 33     | 11              | 15     | 40     | 2      | 20     | 24     | 8      | 23     |
| 30       | 28      | 35     | 25     | 0      | 20     | 48     | 20     | 37     | 10              | 14     | 28     | 3      | 23     | 26     | 6      | 26     |

| SHAM Tension Time Course (Fig. 2G) |         |        |        |        |        |        |        |                 |        |        |        |        |        |        |  |
|------------------------------------|---------|--------|--------|--------|--------|--------|--------|-----------------|--------|--------|--------|--------|--------|--------|--|
| TIME (s)                           | Control |        |        |        |        |        |        | ASIC1a Blockade |        |        |        |        |        |        |  |
|                                    | Rat #1  | Rat #2 | Rat #3 | Rat #4 | Rat #5 | Rat #6 | Rat #7 | Rat #1          | Rat #2 | Rat #3 | Rat #4 | Rat #5 | Rat #6 | Rat #7 |  |
| 0                                  | 0.0     | 0.0    | 0.0    | 0.0    | 0.0    | 0.0    | 0.0    | 0.0             | 0.0    | 0.0    | 0.0    | 0.0    | 0.0    | 0.0    |  |
| 1                                  | 0.8     | 1.4    | 1.0    | 0.8    | 0.8    | 1.3    | 0.7    | 0.8             | 1.2    | 0.8    | 0.9    | 0.8    | 1.1    | 0.5    |  |
| 2                                  | 0.8     | 1.4    | 1.0    | 0.8    | 0.8    | 1.4    | 0.5    | 0.8             | 1.3    | 0.8    | 0.9    | 0.8    | 1.3    | 0.5    |  |
| 3                                  | 0.7     | 1.3    | 1.0    | 0.7    | 0.9    | 1.4    | 0.5    | 0.8             | 1.3    | 0.9    | 0.9    | 0.8    | 1.4    | 0.6    |  |
| 4                                  | 0.7     | 1.3    | 1.0    | 0.7    | 0.9    | 1.4    | 0.5    | 0.8             | 1.3    | 0.9    | 0.9    | 0.8    | 1.4    | 0.6    |  |
| 5                                  | 0.8     | 1.4    | 1.0    | 0.7    | 0.9    | 1.4    | 0.5    | 0.8             | 1.4    | 1.0    | 0.9    | 0.8    | 1.4    | 0.6    |  |
| 6                                  | 0.8     | 1.4    | 1.0    | 0.7    | 1.0    | 1.4    | 0.5    | 0.8             | 1.3    | 1.0    | 0.9    | 0.9    | 1.4    | 0.6    |  |
| 7                                  | 0.8     | 1.3    | 1.0    | 0.7    | 1.0    | 1.4    | 0.5    | 0.8             | 1.3    | 1.0    | 0.9    | 0.9    | 1.4    | 0.5    |  |
| 8                                  | 0.8     | 1.3    | 1.0    | 0.7    | 1.0    | 1.4    | 0.4    | 0.7             | 1.3    | 1.0    | 0.9    | 0.9    | 1.4    | 0.5    |  |
| 9                                  | 0.8     | 1.3    | 1.0    | 0.7    | 1.0    | 1.4    | 0.4    | 0.7             | 1.3    | 1.0    | 0.9    | 0.9    | 1.4    | 0.5    |  |
| 10                                 | 0.8     | 1.3    | 1.0    | 0.7    | 1.0    | 1.4    | 0.4    | 0.7             | 1.3    | 1.0    | 0.9    | 0.9    | 1.4    | 0.5    |  |
| 11                                 | 0.8     | 1.3    | 1.0    | 0.6    | 1.0    | 1.3    | 0.4    | 0.7             | 1.3    | 1.0    | 0.9    | 0.9    | 1.3    | 0.5    |  |
| 12                                 | 0.8     | 1.3    | 1.0    | 0.6    | 0.9    | 1.3    | 0.4    | 0.7             | 1.2    | 1.0    | 0.9    | 0.9    | 1.3    | 0.5    |  |
| 13                                 | 0.8     | 1.3    | 1.0    | 0.6    | 0.9    | 1.3    | 0.4    | 0.7             | 1.2    | 1.0    | 0.8    | 0.9    | 1.3    | 0.5    |  |
| 14                                 | 0.8     | 1.3    | 1.0    | 0.6    | 0.9    | 1.3    | 0.4    | 0.6             | 1.2    | 1.0    | 0.8    | 0.9    | 1.2    | 0.5    |  |
| 15                                 | 0.7     | 1.3    | 1.0    | 0.6    | 0.9    | 1.3    | 0.4    | 0.6             | 1.2    | 1.0    | 0.8    | 0.9    | 1.2    | 0.5    |  |
| 16                                 | 0.7     | 1.3    | 1.0    | 0.6    | 0.9    | 1.3    | 0.3    | 0.6             | 1.1    | 0.9    | 0.8    | 0.9    | 1.2    | 0.4    |  |
| 17                                 | 0.7     | 1.3    | 1.0    | 0.7    | 0.9    | 1.2    | 0.3    | 0.6             | 1.1    | 0.9    | 0.8    | 0.9    | 1.1    | 0.4    |  |
| 18                                 | 0.7     | 1.3    | 1.0    | 0.6    | 0.9    | 1.2    | 0.3    | 0.5             | 1.1    | 0.9    | 0.8    | 0.9    | 1.1    | 0.4    |  |
| 19                                 | 0.6     | 1.3    | 0.9    | 0.6    | 0.8    | 1.2    | 0.3    | 0.5             | 1.0    | 0.9    | 0.7    | 0.9    | 1.1    | 0.4    |  |
| 20                                 | 0.6     | 1.3    | 0.9    | 0.6    | 0.8    | 1.2    | 0.3    | 0.5             | 1.0    | 0.9    | 0.7    | 0.8    | 1.1    | 0.4    |  |
| 21                                 | 0.5     | 1.3    | 0.9    | 0.6    | 0.8    | 1.2    | 0.3    | 0.5             | 1.0    | 0.9    | 0.7    | 0.8    | 1.0    | 0.4    |  |
| 22                                 | 0.5     | 1.2    | 0.9    | 0.6    | 0.7    | 1.1    | 0.3    | 0.5             | 1.0    | 0.9    | 0.7    | 0.8    | 1.0    | 0.4    |  |
| 23                                 | 0.5     | 1.2    | 0.8    | 0.6    | 0.7    | 1.1    | 0.3    | 0.4             | 0.9    | 0.9    | 0.7    | 0.8    | 1.0    | 0.4    |  |
| 24                                 | 0.4     | 1.2    | 0.8    | 0.6    | 0.7    | 1.1    | 0.3    | 0.4             | 0.9    | 0.8    | 0.7    | 0.8    | 0.9    | 0.4    |  |
| 25                                 | 0.4     | 1.2    | 0.7    | 0.6    | 0.6    | 1.1    | 0.3    | 0.4             | 0.9    | 0.8    | 0.6    | 0.8    | 0.9    | 0.3    |  |
| 26                                 | 0.4     | 1.1    | 0.7    | 0.6    | 0.6    | 1.0    | 0.2    | 0.4             | 0.9    | 0.8    | 0.6    | 0.8    | 0.9    | 0.3    |  |
| 27                                 | 0.4     | 1.1    | 0.7    | 0.6    | 0.6    | 1.0    | 0.2    | 0.4             | 0.8    | 0.7    | 0.6    | 0.8    | 0.8    | 0.3    |  |
| 28                                 | 0.4     | 1.0    | 0.6    | 0.6    | 0.6    | 1.0    | 0.2    | 0.4             | 0.8    | 0.7    | 0.6    | 0.7    | 0.8    | 0.3    |  |
| 29                                 | 0.4     | 1.0    | 0.6    | 0.6    | 0.5    | 0.9    | 0.2    | 0.4             | 0.8    | 0.7    | 0.6    | 0.7    | 0.8    | 0.3    |  |
| 30                                 | 0.4     | 1.0    | 0.6    | 0.6    | 0.5    | 0.9    | 0.2    | 0.4             | 0.8    | 0.6    | 0.5    | 0.7    | 0.7    | 0.3    |  |

| HF-rEF Tension Time Course (Fig. 2H) |         |        |        |        |        |        |        |        |                 |        |        |        |        |        |        |        |
|--------------------------------------|---------|--------|--------|--------|--------|--------|--------|--------|-----------------|--------|--------|--------|--------|--------|--------|--------|
|                                      | Control |        |        |        |        |        |        |        | ASIC1a Blockade |        |        |        |        |        |        |        |
| TIME (s)                             | Rat #1  | Rat #2 | Rat #3 | Rat #4 | Rat #5 | Rat #6 | Rat #7 | Rat #8 | Rat #1          | Rat #2 | Rat #3 | Rat #4 | Rat #5 | Rat #6 | Rat #7 | Rat #8 |
| 0                                    | 0.0     | 0.0    | 0.0    | 0.0    | 0.0    | 0.0    | 0.0    | 0.0    | 0.0             | 0.0    | 0.0    | 0.0    | 0.0    | 0.0    | 0.0    | 0.0    |
| 1                                    | 1.0     | 1.1    | 1.0    | 0.8    | 1.0    | 1.2    | 0.8    | 1.4    | 0.9             | 0.9    | 0.9    | 0.8    | 0.8    | 1.1    | 0.7    | 1.3    |
| 2                                    | 1.0     | 1.2    | 1.0    | 0.7    | 1.0    | 1.1    | 0.9    | 1.3    | 1.0             | 0.9    | 1.0    | 0.9    | 0.8    | 0.8    | 0.8    | 1.3    |
| 3                                    | 1.0     | 1.3    | 1.0    | 0.7    | 1.1    | 1.1    | 1.0    | 1.3    | 1.0             | 1.0    | 1.0    | 0.9    | 0.8    | 0.9    | 0.8    | 1.3    |
| 4                                    | 1.0     | 1.2    | 1.0    | 0.7    | 1.1    | 1.1    | 1.0    | 1.3    | 1.1             | 1.2    | 1.0    | 0.9    | 0.8    | 0.9    | 0.8    | 1.1    |
| 5                                    | 1.0     | 1.3    | 1.0    | 0.7    | 1.1    | 1.1    | 1.1    | 1.3    | 1.1             | 1.2    | 1.0    | 0.9    | 0.8    | 0.8    | 0.8    | 1.0    |
| 6                                    | 1.0     | 1.3    | 1.0    | 0.7    | 1.1    | 1.0    | 1.1    | 1.2    | 1.1             | 1.3    | 1.0    | 0.9    | 0.8    | 0.8    | 0.8    | 1.0    |
| 7                                    | 1.0     | 1.3    | 1.0    | 0.7    | 1.1    | 0.9    | 1.1    | 1.2    | 1.1             | 1.3    | 1.0    | 0.9    | 0.8    | 0.9    | 0.8    | 0.9    |
| 8                                    | 1.0     | 1.3    | 1.0    | 0.7    | 1.1    | 1.0    | 1.1    | 1.1    | 1.1             | 1.4    | 0.9    | 0.9    | 0.8    | 0.9    | 0.8    | 0.9    |
| 9                                    | 1.0     | 1.3    | 1.0    | 0.7    | 1.1    | 1.0    | 1.1    | 1.1    | 1.1             | 1.4    | 0.9    | 0.9    | 0.8    | 1.0    | 0.8    | 0.9    |
| 10                                   | 1.0     | 1.3    | 0.9    | 0.7    | 1.0    | 1.0    | 1.1    | 1.0    | 1.1             | 1.4    | 0.9    | 0.9    | 0.8    | 0.9    | 0.8    | 0.9    |
| 11                                   | 1.0     | 1.2    | 0.9    | 0.7    | 1.0    | 0.9    | 1.0    | 1.0    | 1.1             | 1.4    | 0.9    | 0.9    | 0.7    | 1.0    | 0.8    | 0.9    |
| 12                                   | 1.0     | 1.2    | 0.9    | 0.6    | 1.0    | 0.9    | 1.0    | 1.0    | 1.1             | 1.3    | 0.9    | 0.8    | 0.7    | 1.0    | 0.8    | 0.8    |
| 13                                   | 1.0     | 1.2    | 0.9    | 0.6    | 0.9    | 0.9    | 1.0    | 1.0    | 1.0             | 1.3    | 0.8    | 0.8    | 0.7    | 0.9    | 0.8    | 0.8    |
| 14                                   | 1.0     | 1.2    | 0.9    | 0.6    | 0.9    | 0.9    | 1.0    | 1.0    | 1.0             | 1.3    | 0.8    | 0.8    | 0.7    | 0.9    | 0.8    | 0.8    |
| 15                                   | 1.0     | 1.2    | 0.9    | 0.6    | 0.9    | 0.9    | 1.0    | 1.0    | 1.0             | 1.3    | 0.8    | 0.8    | 0.7    | 1.0    | 0.7    | 0.8    |
| 16                                   | 1.0     | 1.2    | 0.9    | 0.6    | 0.8    | 0.9    | 1.0    | 1.0    | 1.0             | 1.3    | 0.8    | 0.8    | 0.6    | 1.0    | 0.7    | 0.8    |
| 17                                   | 1.0     | 1.2    | 0.9    | 0.5    | 0.8    | 0.9    | 1.0    | 1.0    | 1.0             | 1.3    | 0.8    | 0.8    | 0.6    | 1.0    | 0.7    | 0.8    |
| 18                                   | 1.0     | 1.1    | 0.9    | 0.5    | 0.8    | 0.9    | 0.9    | 1.0    | 0.9             | 1.2    | 0.8    | 0.8    | 0.6    | 0.9    | 0.7    | 0.8    |
| 19                                   | 1.0     | 1.1    | 0.9    | 0.5    | 0.7    | 0.9    | 0.9    | 1.0    | 0.9             | 1.2    | 0.7    | 0.7    | 0.6    | 1.0    | 0.7    | 0.8    |
| 20                                   | 1.0     | 1.1    | 0.9    | 0.5    | 0.7    | 0.9    | 0.9    | 1.0    | 0.9             | 1.2    | 0.7    | 0.7    | 0.6    | 0.9    | 0.7    | 0.8    |
| 21                                   | 1.0     | 1.1    | 0.9    | 0.5    | 0.6    | 0.8    | 0.8    | 1.0    | 0.9             | 1.2    | 0.7    | 0.7    | 0.5    | 0.9    | 0.6    | 0.8    |
| 22                                   | 1.0     | 1.1    | 0.9    | 0.4    | 0.6    | 0.8    | 0.8    | 1.0    | 0.9             | 1.2    | 0.7    | 0.7    | 0.5    | 0.9    | 0.6    | 0.8    |
| 23                                   | 0.9     | 1.0    | 0.9    | 0.4    | 0.6    | 0.8    | 0.8    | 1.0    | 0.8             | 1.1    | 0.7    | 0.7    | 0.5    | 0.9    | 0.6    | 0.7    |
| 24                                   | 0.9     | 1.0    | 0.9    | 0.4    | 0.6    | 0.8    | 0.7    | 1.0    | 0.8             | 1.1    | 0.7    | 0.7    | 0.5    | 0.9    | 0.5    | 0.7    |
| 25                                   | 0.9     | 1.0    | 0.9    | 0.4    | 0.5    | 0.8    | 0.7    | 1.0    | 0.8             | 1.1    | 0.6    | 0.7    | 0.5    | 0.9    | 0.5    | 0.7    |
| 26                                   | 0.9     | 1.0    | 0.9    | 0.3    | 0.5    | 0.8    | 0.7    | 1.0    | 0.8             | 1.0    | 0.6    | 0.6    | 0.4    | 1.0    | 0.5    | 0.7    |
| 27                                   | 0.9     | 0.9    | 0.8    | 0.3    | 0.5    | 0.8    | 0.6    | 1.0    | 0.8             | 1.0    | 0.6    | 0.6    | 0.4    | 0.9    | 0.5    | 0.7    |
| 28                                   | 0.9     | 0.9    | 0.8    | 0.3    | 0.5    | 0.8    | 0.6    | 1.0    | 0.7             | 0.9    | 0.6    | 0.6    | 0.4    | 0.9    | 0.5    | 0.7    |
| 29                                   | 0.8     | 0.9    | 0.8    | 0.3    | 0.5    | 0.8    | 0.6    | 0.9    | 0.7             | 0.9    | 0.6    | 0.6    | 0.4    | 0.9    | 0.4    | 0.7    |
| 30                                   | 0.8     | 0.9    | 0.8    | 0.3    | 0.5    | 0.8    | 0.6    | 0.9    | 0.7             | 0.8    | 0.6    | 0.6    | 0.4    | 0.9    | 0.4    | 0.8    |

SHAM RSNA Time Course (Fig. 2A)

| TIME (s) | Control |        |        |        |        |        | ASIC1a Blockade |        |        |        |        |        |
|----------|---------|--------|--------|--------|--------|--------|-----------------|--------|--------|--------|--------|--------|
|          | Rat #1  | Rat #2 | Rat #3 | Rat #4 | Rat #5 | Rat #6 | Rat #1          | Rat #2 | Rat #3 | Rat #4 | Rat #5 | Rat #6 |
| 0        | 0       | 0      | 0      | 0      | 0      | 0      | 0               | 0      | 0      | 0      | 0      | 0      |
| 1        | 250     | 11     | 4      | -12    | 32     | -1     | 94              | -8     | 57     | -14    | 65     | -13    |
| 2        | 85      | 26     | 14     | -11    | -2     | 25     | 27              | 8      | 110    | -2     | 130    | 23     |
| 3        | -137    | 11     | 28     | -4     | 31     | 18     | -77             | 2      | 23     | -5     | 13     | 12     |
| 4        | -98     | 5      | -4     | -8     | 12     | 41     | 12              | 7      | 33     | -14    | 19     | 5      |
| 5        | 47      | 29     | 1      | 0      | 28     | 9      | 3               | -5     | 3      | -1     | 15     | -8     |
| 6        | 41      | 21     | -1     | 1      | 5      | 19     | -15             | -4     | 3      | -6     | -75    | 8      |
| 7        | -19     | 14     | 1      | -5     | 0      | 18     | -6              | 6      | -3     | -11    | 48     | 14     |
| 8        | -22     | 28     | 10     | 5      | 6      | 24     | -17             | 13     | 9      | -6     | -71    | 29     |
| 9        | 23      | 13     | -23    | -6     | 6      | 3      | -3              | 4      | -4     | -6     | 45     | -9     |
| 10       | -60     | 22     | -5     | 1      | -4     | 4      | -18             | -2     | 1      | 0      | -80    | 16     |
| 11       | 29      | 10     | -2     | -1     | -11    | 9      | -21             | 19     | -14    | -3     | 39     | -13    |
| 12       | 5       | 17     | -11    | 7      | 6      | -5     | 4               | 0      | -9     | -4     | -41    | 7      |
| 13       | 2       | 13     | -18    | 3      | 7      | 20     | -21             | 6      | 1      | -5     | 8      | -10    |
| 14       | 36      | 18     | -1     | -1     | -8     | -7     | 14              | 18     | 14     | -7     | -6     | 10     |
| 15       | 11      | 7      | 1      | -2     | 18     | -1     | 6               | 9      | -20    | -4     | -25    | 15     |
| 16       | 0       | 18     | -7     | 5      | -10    | 25     | -5              | 10     | 22     | -6     | 1      | 0      |
| 17       | 6       | 12     | -9     | -1     | 10     | 23     | 14              | 5      | 23     | -2     | -5     | -18    |
| 18       | 19      | -9     | -2     | 8      | 8      | 13     | -1              | 9      | -14    | -4     | -3     | 2      |
| 19       | -2      | 6      | -15    | 11     | -5     | 9      | -7              | 2      | 32     | -3     | 14     | -6     |
| 20       | 4       | 7      | -15    | 2      | 8      | 14     | 3               | -8     | 10     | -3     | -8     | 13     |
| 21       | 24      | -7     | -13    | -3     | 10     | 0      | -13             | 1      | -14    | -7     | 7      | 12     |
| 22       | 0       | 4      | -8     | 11     | -1     | 20     | 11              | -15    | 27     | 0      | 3      | 10     |
| 23       | 12      | -5     | -7     | 3      | 14     | 8      | -23             | -11    | -25    | -5     | 6      | 9      |
| 24       | -9      | 3      | -24    | 3      | -9     | 11     | 6               | -1     | 9      | -1     | -1     | 15     |
| 25       | 57      | 0      | 7      | -2     | 14     | 11     | 10              | -10    | 0      | -12    | -6     | 1      |
| 26       | -37     | 3      | 6      | 0      | 14     | -1     | -1              | 7      | -17    | 0      | 10     | 22     |
| 27       | 0       | -8     | -7     | 6      | -3     | 18     | 14              | -14    | -2     | -9     | 1      | 1      |
| 28       | 2       | 19     | -9     | 6      | -1     | 4      | 2               | -2     | -3     | -3     | 1      | 10     |
| 29       | 4       | -12    | 12     | -3     | 21     | 10     | -5              | -7     | -1     | -2     | -7     | 12     |
| 30       | 20      | -8     | -10    | -3     | 21     | 10     | -5              | -7     | -1     | -2     | -7     | 12     |

HF-rEF RSNA Time Course (Fig. 2B)

| TIME (s) | Control |        |        |        |        |        |        | ASIC1a Blockade |        |        |        |        |        |        |
|----------|---------|--------|--------|--------|--------|--------|--------|-----------------|--------|--------|--------|--------|--------|--------|
|          | Rat #1  | Rat #2 | Rat #3 | Rat #4 | Rat #5 | Rat #6 | Rat #7 | Rat #1          | Rat #2 | Rat #3 | Rat #4 | Rat #5 | Rat #6 | Rat #7 |
| 0        | 0       | 0      | 0      | 0      | 0      | 0      | 0      | 0               | 0      | 0      | 0      | 0      | 0      | 0      |
| 1        | 75      | 139    | 9      | 119    | 79     | 38     | 60     | 80              | 175    | 58     | 65     | 42     | 47     | 32     |
| 2        | 16      | 146    | 24     | 119    | 119    | 0      | 4      | 0               | 54     | 2      | 161    | 59     | -11    | -40    |
| 3        | 41      | 83     | 7      | 122    | 54     | 1      | 12     | 12              | 51     | 1      | -44    | 12     | 9      | -19    |
| 4        | 53      | 99     | -1     | 46     | 10     | 11     | 9      | 22              | 29     | -12    | -2     | 19     | 4      | -2     |
| 5        | 32      | 42     | 7      | 73     | 59     | -14    | 14     | 23              | 18     | -13    | 58     | 10     | -14    | -8     |
| 6        | 32      | 48     | 6      | 52     | 125    | 26     | 11     | 6               | 16     | -7     | -32    | 10     | 19     | -11    |
| 7        | 29      | 77     | -7     | 7      | -25    | -17    | 12     | 14              | 36     | -15    | 43     | 21     | 5      | -3     |
| 8        | 38      | 23     | 9      | 29     | 5      | 13     | 8      | -3              | 31     | -24    | -50    | 16     | 3      | -5     |
| 9        | 40      | 61     | -8     | -20    | 11     | -7     | 9      | 17              | 30     | 3      | 37     | 17     | 9      | -17    |
| 10       | 24      | 33     | 7      | 21     | 6      | 22     | 15     | 9               | 15     | -30    | -11    | -3     | -26    | -2     |
| 11       | 42      | 40     | -5     | 25     | 3      | -3     | -2     | 2               | 39     | -12    | 11     | 11     | 7      | -3     |
| 12       | 43      | 30     | 4      | -17    | 6      | -17    | 28     | 9               | 40     | -11    | -10    | 14     | -12    | -3     |
| 13       | 42      | 70     | -4     | 8      | 4      | 14     | -5     | 14              | 25     | -5     | 39     | 12     | 18     | -7     |
| 14       | 33      | 26     | -3     | 10     | 8      | -3     | 1      | -4              | 7      | -10    | 13     | 13     | 4      | -1     |
| 15       | 27      | 39     | -2     | 20     | 3      | 5      | 16     | 12              | 42     | -8     | -8     | -1     | 6      | -6     |
| 16       | 42      | 53     | -1     | 11     | 19     | -18    | -1     | 6               | 38     | -6     | 23     | 20     | 6      | 2      |
| 17       | 33      | 45     | 0      | 56     | 11     | 19     | 17     | 8               | 56     | -6     | 1      | 10     | -16    | -10    |
| 18       | 24      | 55     | -3     | 24     | 3      | 9      | 0      | 4               | 29     | -14    | -22    | 1      | 4      | -2     |
| 19       | 19      | 45     | 0      | 6      | 7      | 2      | 6      | 3               | 33     | -10    | 13     | 13     | -13    | 3      |
| 20       | 7       | 93     | 0      | 3      | 15     | 19     | 3      | 14              | 32     | -5     | -10    | 8      | -4     | -3     |
| 21       | 18      | 59     | -3     | 23     | 10     | -7     | 1      | 10              | 23     | -11    | 3      | -6     | 10     | -3     |
| 22       | 76      | 49     | 0      | 22     | 10     | 12     | -5     | 0               | 44     | -11    | 28     | 8      | -13    | -11    |
| 23       | 27      | 56     | -6     | 10     | 7      | -8     | 9      | -3              | 26     | 4      | 6      | 15     | 5      | 4      |
| 24       | 34      | 55     | -2     | 13     | 9      | 4      | -3     | 18              | 8      | -22    | 23     | -1     | -6     | 3      |
| 25       | 36      | 46     | 0      | 0      | 5      | 5      | -1     | -6              | 43     | 6      | 18     | 12     | 19     | -1     |
| 26       | 7       | 48     | -6     | 15     | 15     | -13    | 6      | 14              | 40     | 7      | 20     | 4      | -9     | 17     |
| 27       | 38      | 63     | -1     | -22    | 10     | 11     | 0      | 4               | 37     | -24    | 3      | -4     | 3      | -19    |
| 28       | 35      | 56     | -5     | 6      | 14     | -23    | -1     | -3              | 21     | -13    | 44     | 4      | 6      | -13    |
| 29       | 24      | 30     | 1      | 5      | 12     | 8      | -8     | 11              | 24     | -11    | 9      | 16     | 0      | -2     |
| 30       | 49      | 30     | 1      | 5      | 12     | 8      | -8     | -5              | 24     | -11    | 9      | 16     | 0      | -2     |

| SHAM MAP Time Course (Fig. 2C) |         |        |        |        |        |        |                 |        |        |        |        |        |
|--------------------------------|---------|--------|--------|--------|--------|--------|-----------------|--------|--------|--------|--------|--------|
| TIME (s)                       | Control |        |        |        |        |        | ASIC1a Blockade |        |        |        |        |        |
|                                | Rat #1  | Rat #2 | Rat #3 | Rat #4 | Rat #5 | Rat #6 | Rat #1          | Rat #2 | Rat #3 | Rat #4 | Rat #5 | Rat #6 |
| 0                              | 0       | 0      | 0      | 0      | 0      | 0      | 0               | 0      | 0      | 0      | 0      | 0      |
| 1                              | 3       | -1     | 3      | 0      | 0      | -1     | 2               | 0      | -1     | 0      | 1      | 0      |
| 2                              | 43      | 4      | 3      | 0      | 4      | 0      | 23              | 1      | 2      | 0      | 8      | 2      |
| 3                              | 53      | 4      | 2      | -2     | 3      | 2      | 33              | -3     | 11     | 1      | 17     | 3      |
| 4                              | 45      | 4      | 3      | -1     | 0      | 3      | 26              | -9     | 14     | 0      | 20     | 6      |
| 5                              | 28      | 4      | 3      | 0      | 1      | 4      | 3               | -11    | 12     | 0      | 22     | 7      |
| 6                              | 11      | 4      | 4      | 1      | 2      | 4      | 7               | -10    | 8      | 1      | 21     | 9      |
| 7                              | 19      | 6      | 6      | 2      | 5      | 5      | 6               | -9     | 6      | 1      | 20     | 17     |
| 8                              | 19      | 8      | 7      | 2      | 7      | 7      | 9               | -9     | 5      | 2      | 23     | 17     |
| 9                              | 20      | 11     | 8      | 2      | 8      | 8      | 9               | -6     | 6      | 2      | 23     | 15     |
| 10                             | 18      | 14     | 9      | 2      | 10     | 10     | 9               | -5     | 7      | 3      | 24     | 22     |
| 11                             | 14      | 15     | 8      | 1      | 10     | 9      | 9               | -3     | 5      | 3      | 23     | 14     |
| 12                             | 8       | 16     | 7      | 1      | 10     | 9      | 7               | -3     | 6      | 2      | 17     | 17     |
| 13                             | 8       | 14     | 8      | 1      | 10     | 8      | 5               | -3     | 5      | 2      | 16     | 19     |
| 14                             | 8       | 13     | 7      | 1      | 9      | 5      | 4               | -4     | 8      | 2      | 14     | 15     |
| 15                             | 8       | 12     | 7      | 1      | 8      | 4      | 5               | -1     | 9      | 2      | 14     | 15     |
| 16                             | 12      | 10     | 7      | 1      | 7      | 3      | 5               | -1     | 9      | 2      | 13     | 14     |
| 17                             | 11      | 10     | 4      | 1      | 4      | 2      | 5               | 2      | 10     | 3      | 12     | 11     |
| 18                             | 8       | 9      | 5      | 1      | 3      | 0      | 5               | 2      | 12     | 2      | 8      | 10     |
| 19                             | 13      | 9      | 4      | 1      | 1      | 1      | 5               | 2      | 11     | 2      | 9      | 9      |
| 20                             | 12      | 9      | 2      | 1      | 1      | 1      | 4               | 2      | 13     | 2      | 8      | 9      |
| 21                             | 8       | 10     | 2      | 2      | 0      | 0      | 4               | 1      | 13     | 2      | 7      | 7      |
| 22                             | 9       | 11     | 1      | 2      | 1      | 1      | 3               | 4      | 13     | 3      | 6      | 7      |
| 23                             | 10      | 11     | 0      | 2      | 1      | 2      | 2               | 2      | 12     | 4      | 7      | 7      |
| 24                             | 10      | 11     | 1      | 2      | 2      | 2      | 5               | 0      | 11     | 4      | 7      | 8      |
| 25                             | 11      | 10     | 1      | 1      | 3      | 2      | 3               | 1      | 7      | 5      | 7      | 9      |
| 26                             | 13      | 9      | 3      | 1      | 4      | 3      | 3               | 2      | 6      | 6      | 7      | 9      |
| 27                             | 7       | 9      | 4      | 1      | 4      | 2      | 4               | -1     | 6      | 6      | 7      | 8      |
| 28                             | 9       | 7      | 4      | 1      | 4      | 2      | 6               | 0      | 4      | 6      | 7      | 7      |
| 29                             | 9       | 6      | 5      | 2      | 4      | 3      | 6               | -1     | 2      | 5      | 6      | 7      |
| 30                             | 8       | 7      | 6      | 1      | 6      | 3      | 4               | -1     | 2      | 5      | 5      | 7      |

| HF-rEF MAP Time Course (Fig. 2D) |         |        |        |        |        |        |        |                 |        |        |        |        |        |        |
|----------------------------------|---------|--------|--------|--------|--------|--------|--------|-----------------|--------|--------|--------|--------|--------|--------|
| TIME (s)                         | Control |        |        |        |        |        |        | ASIC1a Blockade |        |        |        |        |        |        |
|                                  | Rat #1  | Rat #2 | Rat #3 | Rat #4 | Rat #5 | Rat #6 | Rat #7 | Rat #1          | Rat #2 | Rat #3 | Rat #4 | Rat #5 | Rat #6 | Rat #7 |
| 0                                | 0       | 0      | 0      | 0      | 0      | 0      | 0      | 0               | 0      | 0      | 0      | 0      | 0      | 0      |
| 1                                | 3       | 3      | 3      | 0      | 1      | 0      | 3      | 2               | 3      | 2      | 5      | -1     | 0      | 11     |
| 2                                | 5       | 15     | 6      | 9      | 11     | 1      | 6      | 2               | 19     | 8      | 16     | 3      | 9      | 18     |
| 3                                | 4       | 25     | 14     | 16     | 27     | 6      | 6      | -1              | 34     | 9      | 33     | 10     | 14     | 13     |
| 4                                | 5       | 36     | 21     | 27     | 28     | 11     | 3      | 2               | 40     | 14     | 33     | 14     | 16     | 6      |
| 5                                | 5       | 38     | 24     | 28     | 27     | 22     | 4      | 7               | 41     | 16     | 23     | 16     | 12     | 6      |
| 6                                | 7       | 39     | 28     | 29     | 19     | 22     | 5      | 9               | 41     | 14     | 27     | 17     | 5      | 8      |
| 7                                | 8       | 41     | 26     | 31     | 15     | 23     | 6      | 10              | 37     | 13     | 21     | 17     | 3      | 10     |
| 8                                | 10      | 39     | 28     | 31     | 13     | 20     | 6      | 14              | 34     | 12     | 21     | 19     | 8      | 10     |
| 9                                | 11      | 40     | 29     | 32     | 11     | 12     | 9      | 14              | 36     | 12     | 19     | 19     | 13     | 11     |
| 10                               | 13      | 41     | 27     | 27     | 11     | 14     | 9      | 16              | 37     | 12     | 16     | 19     | 13     | 10     |
| 11                               | 14      | 41     | 29     | 21     | 10     | 20     | 10     | 16              | 37     | 10     | 16     | 18     | 8      | 10     |
| 12                               | 14      | 38     | 25     | 20     | 10     | 20     | 8      | 15              | 37     | 9      | 12     | 15     | 4      | 8      |
| 13                               | 14      | 35     | 28     | 17     | 10     | 10     | 9      | 13              | 38     | 8      | 12     | 14     | 6      | 9      |
| 14                               | 13      | 31     | 26     | 16     | 9      | 11     | 7      | 10              | 39     | 6      | 14     | 15     | 6      | 7      |
| 15                               | 13      | 32     | 28     | 15     | 8      | 5      | 6      | 9               | 34     | 6      | 17     | 15     | 8      | 7      |
| 16                               | 11      | 30     | 25     | 14     | 7      | 13     | 6      | 6               | 28     | 5      | 14     | 12     | 6      | 7      |
| 17                               | 10      | 31     | 22     | 14     | 6      | 10     | 4      | 6               | 30     | 5      | 17     | 12     | 6      | 7      |
| 18                               | 11      | 31     | 21     | 13     | 6      | 2      | 5      | 6               | 34     | 5      | 17     | 12     | 4      | 6      |
| 19                               | 11      | 31     | 17     | 15     | 5      | 4      | 4      | 5               | 35     | 5      | 11     | 10     | 1      | 7      |
| 20                               | 11      | 29     | 17     | 15     | 6      | 3      | 3      | 7               | 33     | 4      | 12     | 11     | 5      | 7      |
| 21                               | 11      | 27     | 17     | 12     | 6      | 7      | 3      | 8               | 32     | 5      | 12     | 12     | 4      | 7      |
| 22                               | 11      | 28     | 15     | 12     | 6      | 8      | 3      | 8               | 30     | 5      | 11     | 11     | 4      | 7      |
| 23                               | 12      | 29     | 16     | 13     | 6      | 9      | 3      | 10              | 33     | 6      | 14     | 10     | 9      | 7      |
| 24                               | 12      | 32     | 17     | 14     | 7      | 7      | 3      | 10              | 34     | 7      | 15     | 10     | 9      | 7      |
| 25                               | 13      | 38     | 15     | 14     | 6      | 8      | 4      | 11              | 33     | 8      | 17     | 10     | 6      | 9      |
| 26                               | 13      | 38     | 15     | 14     | 5      | 8      | 5      | 11              | 32     | 8      | 15     | 10     | 2      | 10     |
| 27                               | 13      | 37     | 15     | 14     | 6      | 6      | 4      | 11              | 32     | 8      | 10     | 10     | 9      | 21     |
| 28                               | 14      | 37     | 14     | 14     | 7      | 8      | 4      | 11              | 34     | 7      | 10     | 11     | 4      | 21     |
| 29                               | 15      | 37     | 13     | 14     | 6      | 8      | 3      | 10              | 34     | 6      | 14     | 8      | 3      | 13     |
| 30                               | 14      | 34     | 14     | 11     | 6      | 7      | 2      | 10              | 32     | 6      | 14     | 9      | 13     | 12     |



SHAM HR Time Course (Fig. 2E)

| TIME (s) | Control |        |        |        |        |        | ASIC1a Blockade |        |        |        |        |        |
|----------|---------|--------|--------|--------|--------|--------|-----------------|--------|--------|--------|--------|--------|
|          | Rat #1  | Rat #2 | Rat #3 | Rat #4 | Rat #5 | Rat #6 | Rat #1          | Rat #2 | Rat #3 | Rat #4 | Rat #5 | Rat #6 |
| 0        | 0       | 0      | 0      | 0      | 0      | 0      | 0               | 0      | 0      | 0      | 0      | 0      |
| 1        | 0       | 0      | 5      | 3      | 1      | 1      | 1               | 0      | -1     | 2      | 0      | -2     |
| 2        | 11      | 1      | 7      | 0      | 2      | 3      | 8               | 5      | -1     | -1     | 2      | 2      |
| 3        | 12      | -1     | 11     | 1      | 2      | 3      | 11              | 4      | 3      | -1     | 7      | 4      |
| 4        | 12      | 3      | 12     | -2     | 3      | 3      | 10              | 4      | 3      | 0      | 11     | 6      |
| 5        | 12      | 5      | 11     | 1      | 4      | 3      | 7               | 4      | 5      | -1     | 13     | 6      |
| 6        | 11      | 4      | 11     | -1     | 4      | 4      | 6               | -1     | 6      | 0      | 14     | 5      |
| 7        | 10      | 5      | 11     | 2      | 4      | 3      | 5               | 1      | 4      | -1     | 12     | 6      |
| 8        | 8       | 7      | 12     | 0      | 3      | 3      | 4               | 1      | 6      | -1     | 14     | 6      |
| 9        | 8       | 7      | 13     | -1     | 3      | 3      | 3               | 2      | 3      | 0      | 14     | 4      |
| 10       | 7       | 8      | 14     | 0      | 3      | 3      | 2               | 2      | 4      | 0      | 13     | 5      |
| 11       | 6       | 6      | 15     | 0      | 1      | 3      | 1               | 1      | 5      | -1     | 11     | 5      |
| 12       | 5       | 7      | 16     | 3      | 1      | 3      | 2               | 0      | 5      | 0      | 12     | 5      |
| 13       | 4       | 8      | 14     | 1      | 3      | 3      | 1               | 0      | 4      | -1     | 10     | 5      |
| 14       | 3       | 7      | 15     | 0      | 1      | 2      | 0               | 0      | 5      | -3     | 10     | 5      |
| 15       | 3       | 8      | 15     | 0      | 2      | 2      | 1               | 2      | 2      | 1      | 9      | 4      |
| 16       | 4       | 7      | 14     | 0      | 3      | 2      | 1               | 4      | 3      | 1      | 7      | 4      |
| 17       | 4       | 6      | 17     | 1      | 3      | 2      | 1               | 0      | 3      | 0      | 7      | 3      |
| 18       | 3       | 6      | 16     | 0      | 3      | 2      | 2               | 2      | 3      | 0      | 6      | 3      |
| 19       | 3       | 3      | 15     | 0      | 4      | 2      | 3               | 3      | 4      | 1      | 6      | 3      |
| 20       | 4       | 4      | 15     | 0      | 4      | 2      | 2               | 2      | 2      | 0      | 5      | 3      |
| 21       | 4       | 4      | 15     | 2      | 5      | 2      | 1               | 2      | 1      | 1      | 5      | 3      |
| 22       | 3       | 4      | 16     | 1      | 2      | 2      | 1               | 3      | 5      | 0      | 5      | 3      |
| 23       | 3       | 5      | 16     | 0      | 2      | 2      | 1               | 0      | 3      | -1     | 5      | 4      |
| 24       | 3       | 5      | 13     | 0      | 1      | 3      | 2               | 0      | 1      | -1     | 6      | 3      |
| 25       | 3       | 6      | 14     | 0      | 1      | 3      | 1               | 0      | 2      | -2     | 5      | 2      |
| 26       | 4       | 4      | 15     | 1      | 0      | 3      | 0               | -2     | 1      | -1     | 9      | 2      |
| 27       | 4       | 4      | 14     | 0      | 1      | 3      | 0               | -3     | 0      | 1      | 9      | 2      |
| 28       | 5       | 5      | 15     | 0      | 2      | 3      | 0               | -3     | 3      | -1     | 4      | 3      |
| 29       | 4       | 2      | 15     | 1      | 1      | 3      | 1               | 0      | 2      | -2     | 8      | 2      |
| 30       | 4       | 3      | 14     | 2      | 2      | 3      | 2               | 0      | 3      | -1     | 2      | 2      |

HF-rEF HR Time Course (Fig. 2F)

| TIME (s) | Control |        |        |        |        |        |        | ASIC1a Blockade |        |        |        |        |        |        |
|----------|---------|--------|--------|--------|--------|--------|--------|-----------------|--------|--------|--------|--------|--------|--------|
|          | Rat #1  | Rat #2 | Rat #3 | Rat #4 | Rat #5 | Rat #6 | Rat #7 | Rat #1          | Rat #2 | Rat #3 | Rat #4 | Rat #5 | Rat #6 | Rat #7 |
| 0        | 0       | 0      | 0      | 0      | 0      | 0      | 0      | 0               | 0      | 1      | 0      | 0      | 0      | 0      |
| 1        | 2       | 0      | 1      | -3     | 5      | 3      | -1     | 8               | -1     | 0      | 0      | -1     | -3     | -2     |
| 2        | 3       | 5      | 7      | 10     | 15     | 1      | -1     | 3               | 12     | 5      | 7      | 3      | 0      | -1     |
| 3        | 5       | 9      | 8      | 10     | 14     | 1      | 3      | 3               | 19     | 10     | 12     | 7      | 1      | 3      |
| 4        | 5       | 12     | 15     | 18     | 18     | 1      | 3      | 3               | 21     | 13     | 13     | 8      | 2      | 1      |
| 5        | 9       | 15     | 15     | 19     | 19     | 2      | 1      | 5               | 23     | 14     | 15     | 9      | 2      | 2      |
| 6        | 4       | 17     | 18     | 18     | 23     | 4      | 2      | 3               | 25     | 13     | 17     | 11     | 1      | 2      |
| 7        | 3       | 18     | 16     | 19     | 22     | 2      | 2      | 2               | 26     | 12     | 15     | 11     | 1      | -1     |
| 8        | 3       | 21     | 19     | 20     | 23     | 7      | 1      | 3               | 25     | 12     | 17     | 11     | 0      | 0      |
| 9        | 2       | 21     | 20     | 23     | 22     | 1      | -1     | 3               | 26     | 10     | 15     | 12     | 1      | -1     |
| 10       | 2       | 20     | 20     | 19     | 22     | 2      | 0      | 2               | 26     | 7      | 15     | 12     | 1      | 1      |
| 11       | 2       | 22     | 21     | 21     | 22     | 0      | 1      | 4               | 27     | 5      | 15     | 13     | 4      | 1      |
| 12       | 3       | 22     | 25     | 20     | 22     | 2      | 0      | 6               | 25     | 3      | 14     | 13     | 4      | 2      |
| 13       | 3       | 21     | 21     | 20     | 21     | 2      | 1      | 6               | 27     | 5      | 13     | 13     | 0      | 0      |
| 14       | 5       | 21     | 20     | 16     | 21     | 1      | 2      | 3               | 28     | 7      | 13     | 13     | 3      | 0      |
| 15       | 8       | 22     | 18     | 16     | 22     | 0      | -1     | 2               | 28     | 5      | 14     | 14     | 2      | 3      |
| 16       | 5       | 21     | 17     | 13     | 21     | 0      | -5     | 6               | 26     | 5      | 13     | 13     | 5      | 0      |
| 17       | 5       | 22     | 17     | 12     | 21     | 0      | -1     | 2               | 26     | 4      | 12     | 13     | 3      | 3      |
| 18       | 6       | 23     | 16     | 15     | 22     | 0      | -1     | 9               | 25     | 4      | 12     | 14     | 2      | -1     |
| 19       | 5       | 23     | 16     | 11     | 20     | 3      | 1      | 7               | 26     | 5      | 11     | 13     | 2      | 2      |
| 20       | 3       | 20     | 13     | 11     | 20     | 1      | -2     | 3               | 25     | 5      | 12     | 13     | 1      | 0      |
| 21       | 4       | 21     | 11     | 11     | 21     | 1      | 0      | 3               | 25     | 2      | 9      | 14     | 2      | 3      |
| 22       | 3       | 19     | 10     | 12     | 20     | 3      | -1     | 1               | 24     | 4      | 10     | 14     | 3      | 4      |
| 23       | 2       | 21     | 12     | 10     | 21     | 2      | -2     | 1               | 24     | 3      | 10     | 13     | 1      | 3      |
| 24       | 3       | 21     | 11     | 13     | 20     | 3      | -1     | 2               | 23     | 5      | 10     | 14     | 2      | 3      |
| 25       | 3       | 20     | 12     | 13     | 20     | 2      | -2     | 4               | 23     | 4      | 10     | 13     | 2      | 1      |
| 26       | 5       | 21     | 10     | 11     | 20     | 2      | -2     | 4               | 23     | 3      | 11     | 13     | 1      | 2      |
| 27       | 4       | 20     | 11     | 14     | 20     | 3      | 0      | 1               | 22     | 3      | 13     | 14     | 4      | 3      |
| 28       | 4       | 21     | 8      | 9      | 20     | 1      | 0      | 1               | 21     | 6      | 10     | 13     | 3      | 5      |
| 29       | 4       | 20     | 8      | 11     | 21     | 2      | -2     | 2               | 21     | 4      | 12     | 14     | 0      | 1      |
| 30       | 5       | 20     | 9      | 9      | 20     | 2      | 0      | 3               | 22     | 3      | 14     | 13     | 3      | 3      |

SHAM Tension Time Course (Fig. 2G)

| TIME (s) | Control |        |        |        |        |        | ASIC1a Blockade |        |        |        |        |        |
|----------|---------|--------|--------|--------|--------|--------|-----------------|--------|--------|--------|--------|--------|
|          | Rat #1  | Rat #2 | Rat #3 | Rat #4 | Rat #5 | Rat #6 | Rat #1          | Rat #2 | Rat #3 | Rat #4 | Rat #5 | Rat #6 |
| 0        | 0.00    | 0.00   | 0.00   | 0.00   | 0.00   | 0.00   | 0.00            | 0.00   | 0.00   | 0.00   | 0.00   | 0.00   |
| 1        | 0.97    | 0.98   | 0.92   | 0.93   | 0.79   | 0.98   | 0.82            | 1.10   | 0.81   | 0.80   | 1.18   | 0.90   |
| 2        | 0.88    | 0.92   | 0.87   | 0.85   | 0.71   | 0.86   | 0.76            | 1.04   | 0.74   | 0.72   | 1.06   | 0.85   |
| 3        | 0.85    | 0.88   | 0.83   | 0.81   | 0.67   | 0.82   | 0.73            | 1.00   | 0.70   | 0.69   | 1.01   | 0.80   |
| 4        | 0.83    | 0.86   | 0.82   | 0.79   | 0.65   | 0.80   | 0.71            | 0.99   | 0.69   | 0.67   | 0.99   | 0.78   |
| 5        | 0.81    | 0.85   | 0.80   | 0.78   | 0.63   | 0.79   | 0.70            | 0.97   | 0.67   | 0.66   | 0.97   | 0.77   |
| 6        | 0.80    | 0.84   | 0.79   | 0.77   | 0.62   | 0.78   | 0.69            | 0.97   | 0.66   | 0.65   | 0.96   | 0.76   |
| 7        | 0.79    | 0.83   | 0.78   | 0.76   | 0.61   | 0.77   | 0.68            | 0.96   | 0.65   | 0.64   | 0.95   | 0.75   |
| 8        | 0.79    | 0.83   | 0.78   | 0.75   | 0.60   | 0.76   | 0.68            | 0.95   | 0.65   | 0.64   | 0.93   | 0.74   |
| 9        | 0.78    | 0.82   | 0.77   | 0.75   | 0.60   | 0.75   | 0.67            | 0.95   | 0.64   | 0.63   | 0.93   | 0.74   |
| 10       | 0.77    | 0.82   | 0.76   | 0.74   | 0.59   | 0.75   | 0.67            | 0.94   | 0.63   | 0.63   | 0.92   | 0.73   |
| 11       | 0.77    | 0.81   | 0.76   | 0.74   | 0.59   | 0.74   | 0.67            | 0.94   | 0.63   | 0.63   | 0.91   | 0.73   |
| 12       | 0.76    | 0.81   | 0.75   | 0.73   | 0.58   | 0.74   | 0.66            | 0.93   | 0.62   | 0.62   | 0.90   | 0.72   |
| 13       | 0.76    | 0.80   | 0.75   | 0.73   | 0.58   | 0.73   | 0.66            | 0.93   | 0.62   | 0.62   | 0.90   | 0.72   |
| 14       | 0.75    | 0.80   | 0.74   | 0.73   | 0.57   | 0.73   | 0.66            | 0.93   | 0.62   | 0.62   | 0.89   | 0.72   |
| 15       | 0.75    | 0.80   | 0.74   | 0.72   | 0.57   | 0.73   | 0.65            | 0.93   | 0.61   | 0.61   | 0.89   | 0.71   |
| 16       | 0.75    | 0.79   | 0.74   | 0.72   | 0.56   | 0.72   | 0.65            | 0.92   | 0.61   | 0.61   | 0.88   | 0.71   |
| 17       | 0.74    | 0.79   | 0.73   | 0.72   | 0.56   | 0.72   | 0.65            | 0.92   | 0.61   | 0.61   | 0.88   | 0.71   |
| 18       | 0.74    | 0.79   | 0.73   | 0.71   | 0.56   | 0.72   | 0.64            | 0.92   | 0.60   | 0.60   | 0.87   | 0.70   |
| 19       | 0.74    | 0.78   | 0.73   | 0.71   | 0.55   | 0.72   | 0.64            | 0.92   | 0.60   | 0.60   | 0.87   | 0.70   |
| 20       | 0.73    | 0.78   | 0.72   | 0.71   | 0.55   | 0.71   | 0.64            | 0.91   | 0.60   | 0.60   | 0.87   | 0.70   |
| 21       | 0.73    | 0.78   | 0.72   | 0.70   | 0.55   | 0.71   | 0.64            | 0.91   | 0.60   | 0.60   | 0.86   | 0.69   |
| 22       | 0.73    | 0.78   | 0.72   | 0.70   | 0.55   | 0.71   | 0.64            | 0.91   | 0.59   | 0.60   | 0.86   | 0.69   |
| 23       | 0.73    | 0.78   | 0.72   | 0.70   | 0.54   | 0.70   | 0.63            | 0.91   | 0.59   | 0.59   | 0.86   | 0.69   |
| 24       | 0.72    | 0.77   | 0.71   | 0.70   | 0.54   | 0.70   | 0.63            | 0.90   | 0.59   | 0.59   | 0.85   | 0.69   |
| 25       | 0.72    | 0.77   | 0.71   | 0.70   | 0.54   | 0.70   | 0.63            | 0.90   | 0.59   | 0.59   | 0.85   | 0.68   |
| 26       | 0.72    | 0.77   | 0.71   | 0.69   | 0.54   | 0.70   | 0.63            | 0.90   | 0.58   | 0.59   | 0.85   | 0.68   |
| 27       | 0.72    | 0.77   | 0.71   | 0.69   | 0.53   | 0.69   | 0.63            | 0.90   | 0.58   | 0.59   | 0.85   | 0.68   |
| 28       | 0.71    | 0.76   | 0.70   | 0.69   | 0.53   | 0.69   | 0.63            | 0.90   | 0.58   | 0.59   | 0.84   | 0.68   |
| 29       | 0.71    | 0.76   | 0.70   | 0.69   | 0.53   | 0.69   | 0.62            | 0.90   | 0.58   | 0.58   | 0.84   | 0.68   |
| 30       | 0.71    | 0.76   | 0.70   | 0.69   | 0.53   | 0.69   | 0.62            | 0.90   | 0.58   | 0.58   | 0.84   | 0.67   |

| HF-rEF Tension Time Course (Fig. 2H) |         |        |        |        |        |        |        |                 |        |        |        |        |        |        |
|--------------------------------------|---------|--------|--------|--------|--------|--------|--------|-----------------|--------|--------|--------|--------|--------|--------|
| TIME (s)                             | Control |        |        |        |        |        |        | ASIC1a Blockade |        |        |        |        |        |        |
|                                      | Rat #1  | Rat #2 | Rat #3 | Rat #4 | Rat #5 | Rat #6 | Rat #7 | Rat #1          | Rat #2 | Rat #3 | Rat #4 | Rat #5 | Rat #6 | Rat #7 |
| 0                                    | 0.00    | 0.00   | 0.00   | 0.00   | 0.00   | 0.00   | 0.00   | 0.00            | 0.00   | 0.00   | 0.00   | 0.00   | 0.00   | 0.00   |
| 1                                    | 1.02    | 0.88   | 1.21   | 0.56   | 1.12   | 1.25   | 1.06   | 0.93            | 0.77   | 1.23   | 0.59   | 0.98   | 1.22   | 1.34   |
| 2                                    | 0.90    | 0.75   | 1.11   | 0.48   | 0.99   | 1.15   | 0.97   | 0.88            | 0.72   | 1.16   | 0.53   | 0.91   | 1.10   | 1.26   |
| 3                                    | 0.85    | 0.71   | 1.07   | 0.46   | 0.93   | 1.11   | 0.93   | 0.85            | 0.68   | 1.10   | 0.51   | 0.88   | 1.05   | 0.78   |
| 4                                    | 0.83    | 0.68   | 1.04   | 0.44   | 0.90   | 1.08   | 0.91   | 0.84            | 0.66   | 1.09   | 0.49   | 0.86   | 1.03   | 0.78   |
| 5                                    | 0.82    | 0.66   | 1.03   | 0.43   | 0.88   | 1.07   | 0.90   | 0.83            | 0.65   | 1.06   | 0.48   | 0.84   | 1.01   | 0.77   |
| 6                                    | 0.80    | 0.65   | 1.01   | 0.42   | 0.87   | 1.05   | 0.89   | 0.82            | 0.64   | 1.05   | 0.48   | 0.83   | 1.00   | 0.77   |
| 7                                    | 0.79    | 0.63   | 1.00   | 0.42   | 0.85   | 1.04   | 0.88   | 0.81            | 0.63   | 1.04   | 0.47   | 0.82   | 0.99   | 0.77   |
| 8                                    | 0.79    | 0.62   | 1.00   | 0.41   | 0.84   | 1.03   | 0.88   | 0.81            | 0.62   | 1.03   | 0.47   | 0.82   | 0.98   | 0.76   |
| 9                                    | 0.78    | 0.62   | 0.99   | 0.41   | 0.83   | 1.02   | 0.87   | 0.80            | 0.62   | 1.02   | 0.46   | 0.81   | 0.97   | 0.76   |
| 10                                   | 0.77    | 0.61   | 0.98   | 0.40   | 0.82   | 1.01   | 0.86   | 0.80            | 0.61   | 1.02   | 0.46   | 0.81   | 0.97   | 0.76   |
| 11                                   | 0.77    | 0.61   | 0.97   | 0.40   | 0.82   | 1.01   | 0.86   | 0.80            | 0.61   | 1.01   | 0.45   | 0.80   | 0.96   | 0.75   |
| 12                                   | 0.76    | 0.60   | 0.97   | 0.40   | 0.81   | 1.00   | 0.85   | 0.79            | 0.60   | 1.00   | 0.45   | 0.80   | 0.96   | 0.75   |
| 13                                   | 0.76    | 0.59   | 0.96   | 0.39   | 0.81   | 1.00   | 0.85   | 0.79            | 0.54   | 1.00   | 0.45   | 0.79   | 0.95   | 0.75   |
| 14                                   | 0.75    | 0.59   | 0.96   | 0.39   | 0.80   | 0.99   | 0.85   | 0.79            | 0.53   | 0.99   | 0.44   | 0.79   | 0.95   | 0.75   |
| 15                                   | 0.75    | 0.58   | 0.95   | 0.39   | 0.80   | 0.99   | 0.84   | 0.78            | 0.53   | 0.99   | 0.44   | 0.79   | 0.94   | 0.75   |
| 16                                   | 0.74    | 0.58   | 0.95   | 0.38   | 0.79   | 0.98   | 0.84   | 0.78            | 0.53   | 0.99   | 0.44   | 0.78   | 0.94   | 0.74   |
| 17                                   | 0.74    | 0.58   | 0.95   | 0.38   | 0.79   | 0.98   | 0.84   | 0.78            | 0.52   | 0.98   | 0.44   | 0.78   | 0.93   | 0.74   |
| 18                                   | 0.74    | 0.57   | 0.94   | 0.38   | 0.79   | 0.98   | 0.83   | 0.77            | 0.52   | 0.98   | 0.43   | 0.78   | 0.93   | 0.74   |
| 19                                   | 0.73    | 0.57   | 0.94   | 0.38   | 0.78   | 0.97   | 0.83   | 0.77            | 0.52   | 0.97   | 0.43   | 0.77   | 0.93   | 0.74   |
| 20                                   | 0.73    | 0.56   | 0.94   | 0.38   | 0.78   | 0.97   | 0.83   | 0.77            | 0.51   | 0.97   | 0.43   | 0.77   | 0.92   | 0.74   |
| 21                                   | 0.73    | 0.56   | 0.93   | 0.37   | 0.78   | 0.97   | 0.82   | 0.77            | 0.51   | 0.97   | 0.43   | 0.77   | 0.92   | 0.74   |
| 22                                   | 0.72    | 0.56   | 0.93   | 0.37   | 0.77   | 0.96   | 0.82   | 0.77            | 0.51   | 0.97   | 0.43   | 0.77   | 0.92   | 0.74   |
| 23                                   | 0.72    | 0.56   | 0.93   | 0.37   | 0.77   | 0.96   | 0.82   | 0.76            | 0.51   | 0.96   | 0.42   | 0.76   | 0.91   | 0.73   |
| 24                                   | 0.72    | 0.55   | 0.92   | 0.37   | 0.77   | 0.96   | 0.82   | 0.76            | 0.50   | 0.96   | 0.42   | 0.76   | 0.91   | 0.73   |
| 25                                   | 0.72    | 0.55   | 0.92   | 0.37   | 0.77   | 0.96   | 0.82   | 0.76            | 0.50   | 0.96   | 0.42   | 0.76   | 0.91   | 0.73   |
| 26                                   | 0.71    | 0.55   | 0.92   | 0.36   | 0.76   | 0.95   | 0.81   | 0.76            | 0.50   | 0.95   | 0.42   | 0.76   | 0.91   | 0.73   |
| 27                                   | 0.71    | 0.55   | 0.92   | 0.36   | 0.76   | 0.95   | 0.81   | 0.76            | 0.50   | 0.95   | 0.42   | 0.76   | 0.91   | 0.73   |
| 28                                   | 0.71    | 0.54   | 0.91   | 0.36   | 0.76   | 0.95   | 0.81   | 0.76            | 0.50   | 0.95   | 0.42   | 0.75   | 0.90   | 0.73   |
| 29                                   | 0.71    | 0.54   | 0.91   | 0.36   | 0.76   | 0.95   | 0.81   | 0.76            | 0.50   | 0.95   | 0.41   | 0.75   | 0.90   | 0.73   |
| 30                                   | 0.67    | 0.54   | 0.91   | 0.36   | 0.75   | 0.95   | 0.81   | 0.75            | 0.49   | 0.94   | 0.41   | 0.75   | 0.90   | 0.72   |
